# 1 A new tool for 3D segmentation of computed tomography data :

## 2 *Drishti Paint* and its applications

3 Yuzhi Hu<sup>1,2</sup>, Ajay Limaye<sup>3</sup>, Jing Lu<sup>4\*</sup>

4 <sup>1</sup>Department of Applied Mathematics, Research School of Physics, Australian

5 National University, Canberra, ACT, Australia 2601

6 <sup>2</sup>Research School of Earth Sciences, Australian National University, Canberra, ACT,

7 Australia 2601

8 <sup>3</sup>National Computational Infrastructure, Building 143, Corner of Ward Road and

9 Garran Road, Ward Rd, Canberra, ACT, Australia 2601

10 <sup>4</sup>Institute of Vertebrate Paleontology and Paleoanthropology, Chinese Academy of

11 Sciences, Beijing, China 100044

12 \*Corresponding author: [lujing@ivpp.ac.cn](mailto:lujing@ivpp.ac.cn)

## 13 **Abstract**

14 Computational tomography is more and more widely used in many fields for its non-

15 destructive and high-resolution in detecting internal structures of the samples. 3D

16 segmentation of computed tomography data, which sheds light into internal features

17 of target objects, is increasingly gaining in importance. However, how to efficiently

18 and precisely reconstruct computed tomography data and better represent the data

19 remains a hassle. Here, using a set of scan data of a fossil fish as a case study, we

20 present a new release of open-source volume exploration, rendering, and 3D

21 segmentation software, *Drishti* v2.6.6, and its protocol for performing 3D

22 segmentation and other advanced applications. We provide new toolsets and

23 workflow to segment computed tomography data thus benefit the scientific  
24 community with more accurate and precise digital reconstruction, 3D modelling and  
25 3D printing results. Our procedure is widely applicable not only in palaeontology, but  
26 also in biological, medical, and industrial researches, and can be used as a framework  
27 to segment computed tomography and other forms of volumetric data from any  
28 research field.

29 **Keywords** 3D Segmentation, *Drishti Paint*, computed tomography data,  
30 volumetric data

31

## 32 **1 Introduction**

33 Nowadays, computed tomography (CT) is widely used in many fields, such as  
34 medicine, science, industry and education [1-5]. To have a better understanding of the  
35 data generated from CT, 3D scientific visualization becomes more and more  
36 important for researchers to obtain better insights [6-9]. For the last four decades, 3D  
37 scientific visualization field have been developed with new ways to visualize and  
38 analyse data more accurately [10-19]. Two techniques have emerged to provide  
39 different visualizations: surface rendering, the method of interpreting data-sets by  
40 generating a set of polygons that represent the wanted feature; and volume rendering  
41 [10], a more direct way for the reconstruction of 3D structures, which represents 3D  
42 objects as a collection of cube-like building blocks called voxels, or volume elements.  
43 However, the importance of scientific visualization software along with their  
44 functionality was underestimated by the community due to lack of public exposure  
45 and communications between multidiscipline.

3D segmentation, segmenting the internal structures in sequences of images, is a key tool for investigating and understanding the internal structures of target objects [6, 20-22]. The 3D segmenting methods rely on thresholding, edge detection, clustering, or region growing to group pixels based on brightness, colour, or texture [21]. Compared with researches carried out in the image processing field, more requirements have to be met towards building and developing applications which require the use of more efficient and effective techniques to save time and resources.

*Drishti*, as an open-source volume exploration, rendering and 3D segmentation software [23], is well-known for its superb visualization outcomes [6, 24-26]. Here we present the latest released *Drishti* v2.6.6, and the last developed module *Drishti Paint* v2.6.6, as a new toolset for 3D segmentation (2D and 3D painters) of volumetric data (i.e. a 3D volume produced by a group of 2D images of a slice or section of the scanned object acquired by X-ray imaging and Magnetic resonance imaging, etc.) by using the CT scan data of a fossil fish as case study. We also suggest protocols for how to perform 3D segmentation using *Drishti Paint* v2.6.6 efficiently and precisely. New features in *Drishti*, such as mesh generation and simplification, allow 3D printing, model simulation, etc.) are also covered in this study.

## 2 Materials and Methods

### 2.1 Materials

The material used in this study, a Devonian unnamed placoderm fish (ANU V244) from Burrinjuck, near Canberra, south-eastern Australia, is held at Australian National University [3], Canberra, Australia. The whole specimen and the separated right anterior upper toothplate were scanned in 2015 [27, 28] at CT Lab, ANU [7]

using a HeliScan MicroCT system with 1.2mm aluminium/ 0.35mm stainless steel for the whole specimen and 2mm aluminium filters for the upper toothplate to yield sharp images [18, 29] at a resolution of 21 $\mu$ m and 2 $\mu$ m respectively. CT data was reconstructed using an in-house software called *Mango* (<https://physics.anu.edu.au/appmaths/capabilities/mango.php>).

## 2.2 Methods

The CT datasets were explored and rendered using *Drishti* v2.6.6. The individual data sets were read at low resolution, and contrast was incremented with the help of histograms and slides were filtered. The information thus generated is written as \*.pvl.nc for saved files (i.e. processed volume format) or \*.xml (i.e. Extensible Markup Language format) for saved projects. The scan data was demonstrated by a protocol for segmenting the 3D volumetric data using *Drishti Paint* v2.6.6. The right cheek complex was segmented out of the whole dataset. The internal structure under the region-of-interest of its right anterior upper toothplate has been segmented as another case study.

## 3 Results and discussions

3D segmentation is often hampered by the time-intensive nature of extracting information from samples, the complexity of preparing fossils digitally, and the need for hardware. Here we highlight the workflow and key features of the *Paint* module for *Drishti* and the general applications of *Drishti* using CT data of an Early Devonian placoderm fish [27, 28] as an example. A suggested workflow of segmenting volumetric data in *Drishti* v2.6.6 is presented here (figure 1), which can generate good results in terms of segmentation, rendering and surface mesh generation outputs. Our protocols can be used as a baseline or starting point to practice accordingly in order to

94 obtain an ideal result for a specified dataset. To help with a better understanding into  
 95 other aspects of *Drishti*, we also provide additional information about *Drishti*, such as  
 96 installation instructions, a summary of all *Drishti*-supported import formats,  
 97 additional learning resources and background of the program (see supplemental  
 98 information).

99         Three modules, *Drishti import*, *Drishti render* and *Drishti paint*, have their  
 100 capacities and features, and can be used in combination with each other to ensure an  
 101 accurate and precise segmentation along with volume rendering to help with visualize  
 102 a region-of-interest and solve scientific problems. *Drishti Paint* uses a combination of  
 103 discontinuity detection based and similarity detection-based image segmentation  
 104 approaches. There are two modes in *Drishti Paint* v2.6.6, Graph Cut and Curve,  
 105 which are designed specifically to consider 2D slices in volumetric data or 3D volume  
 106 directly.

107         Two transformations in mathematical morphology (i.e. erosion and dilation)  
 108 were implemented in *Drishti Paint* and we used a combination of these two  
 109 transformations with 3D Freeform Painter to help with a faster segmentation process.  
 110 The right cheek complex has been segmented from the original CT dataset of the  
 111 whole specimen (figure 2). The internal canal networks of a selected region-of-  
 112 interest on the right anterior upper toothplate have been segmented from the original  
 113 dataset of the toothplate (figure 3). Processed data then exported as separate volumes  
 114 by extracting the tagged volume after tagging the regions of interests using the  
 115 tagging function. Both segmentations were carried out in 16-bits full resolution in  
 116 alignment with their source data and used type 2 gradient thresholding with values  
 117 thresholding to select the range of the histogram for segmenting.

118           We suggest that these two transforms are more useful when using clean and  
 119   high contract dataset as a risk of changing the morphology of the input datasets by  
 120   doing multiple transformations at once. Multiple-thresholding (i.e. use both values  
 121   and gradient thresholding) in *Drishti Paint* v2.6.6 is very effective for volume  
 122   segmentation and usually is the first step towards segmenting a volume (figures 2d  
 123   and 3b), however, it is also very sensible to noise and intensity in homogeneities. In  
 124   this case, to segment the internal canal networks of the selected region is tightly  
 125   related to the selected thresholds, and any small changes in the thresholds values can  
 126   lead to different segmented results, which is one of the key factors need to set up  
 127   specifically and choose carefully per dataset (figures 2 and 3, supplementary figures 3  
 128   and 4).

129           The segmented right cheek unit has also been extracted as surface meshes  
 130   (figure 4). The surface mesh data of the right cheek unit went through different stages  
 131   of simplification process (figure 4b-d) to produce good quality surface models with  
 132   relatively small file size allowing quicker physical analysing (e.g. finite element  
 133   analysis) and 3D printing. Mesh simplification results show that the number of  
 134   vertices affects the presentation of the information and the detection of details (figure  
 135   3). When more triangles have been decimated, fewer details from data are detected  
 136   (i.e. loss of information) resulting in a reduction in file size which allows easier  
 137   sharing of the digital 3D model [20] or uploading the model to open data repository  
 138   for educating the public [21] without giving out details that are still under  
 139   investigation. By looking at the amount of details lost/preserved pointed by the arrows  
 140   (figure 4), we recommend a mesh smoothing factor of 2 and 50% decimation based  
 141   on our segmented cheek 3D model (figure 4d) as it halves the data size but still  
 142   preserves most of the information. 3D models can then be used to generate 3D

143 printouts [30] or 3D portable documents [31] to test a previous hypothesis or help  
144 with functional morphology investigations.

## 145 **4 Conclusions**

146 Here we provide a new tool and workflow to segment volumetric data thus  
147 benefit the scientific community with more accurate and precise digital reconstruction,  
148 3D modelling and 3D printing in *Drishti*. This procedure can be used as a framework  
149 to segment computed tomography and other forms of volumetric data and widely  
150 applicable in biological, medical and earth science researches. Our work will surely  
151 fuel further multiple cross-discipline collaborations between scientific visualization  
152 and many other fields.

## 153 **Data accessibility**

154 3D surface mesh data of the segmented right cheek complex with different levels of  
155 simplification, and a movie shows the segmented internal canal networks of the  
156 toothplate are available from the fig share repository:  
157 <https://figshare.com/s/244e5f407d331a39b402>.

158 *Drishti* v2.6.6 is available from: <https://github.com/nci/Drishti>

## 159 **Authors' Contributions**

160 J.L. and Y.H. designed the study. Y.H., J.L., A.L. performed the research and drafted  
161 the manuscript. Y.H. and J.L. prepared the figures. A.L. developed *Drishti* v2.6.6. All  
162 authors revised the manuscript. Y.H. and A.L. contributed equally.

## 163     **Competing Interests**

164     The authors declare no competing interests.

## 165     **Funding**

166     This research was funded by the Strategic Priority Research Program of the Chinese  
 167     Academy of Sciences (Grant No. XDB26000000) and the National Natural Science  
 168     Foundation of China (41872023). Y.H. was supported by a Postgraduate Research  
 169     Scholarship at the Research School of Physics, Australian National University. The  
 170     development of *Drishti* is supported by National Computational Infrastructure,  
 171     Australian National University. CT scans and 3D printing are supported by ANU CT  
 172     Lab.

## 173     **Acknowledgements**

174     We acknowledge Tim Senden and Gavin Young for their continuous support and help  
 175     with proofreading. We thank the CT Lab at the Australian National University for CT  
 176     Scanning.

177

## 178     **References**

- 179     1.     Kingston AM, Myers GR, Latham SJ, Recur B, Li H, Sheppard AP. 2018  
 180     Space-filling X-ray source trajectories for efficient scanning in large-angle cone-beam  
 181     computed tomography. *IEEE Transactions on Computational Imaging* **4**, 447-458.  
 182     (doi: 10.1109/TCI.2018.2841202)



- 183 2. Zhu M, Ahlberg PE, Pan Z, Zhu Y, Qiao T, Zhao W, et al. 2016 A Silurian  
184 maxillate placoderm illuminates jaw evolution. *Science* **354**, 334-336. (doi:  
185 10.1126/science.aah3764)
- 186 3. Geier B, Sogin EM, Michellod D, Janda M, Kompauer M, Spengler B, et al.  
187 2020 Spatial metabolomics of in situ host-microbe interactions at the micrometre  
188 scale. *Nat. microbiol.* **5**: 498-510. (doi: 10.1038/s41564-019-0664-6)
- 189 4. O'Rourke JC, Smyth L, Webb AL, Valter K. 2020 How Can We Show You, If  
190 You Can't See It? Trialing the Use of an Interactive Three-Dimensional Micro-CT  
191 Model in Medical Education. *Anat. Sci. Educ.* **13**: 206-217. (doi: 10.1002/ase.1890)
- 192 5. Taylor GJ, Hall SA, Gren JA, Baird E. 2020 Exploring the visual world of  
193 fossilized and modern fungus gnat eyes (Diptera: Keroplatidae) with X-ray  
194 microtomography. *J. R. Soc. Interface* **17**:20190750. (doi: 10.1098/rsif.2019.0750).
- 195 6. Lautenschlager S. 2016 Reconstructing the past: Methods and techniques for  
196 the digital restoration of fossils. *R. Soc. open sci.* **3**:160342. (doi:  
197 10.1098/rsos.160342).
- 198 7. Davies TG, Rahman IA, Lautenschlager S, Cunningham JA, Asher RJ, Barrett  
199 PM, et al. 2017 Open data and digital morphology. *Proc. R. Soc. B.* 284: 20170194.  
200 (doi: 10.1098/rspb.2017.0194).
- 201 8. Hoffmann R, Lemanis RE, Falkenberg J, Schneider S, Wesendonk H, Zachow  
202 S, et al. 2018 Integrating 2D and 3D shell morphology to disentangle the  
203 palaeobiology of ammonoids: a virtual approach. *Palaeontology* **61**:89-104.  
204 (doi:10.1111/pala.12328)
- 205 9. Semple TL, Peakall R, Tatarnic NJ. 2019 A comprehensive and user-friendly  
206 framework for 3D data visualisation in invertebrates and other organisms. *J.*  
207 *Morphol.* **280**:223-231. (doi: 10.1002/jmor.20938)

- 208 10. Drebin RA, Carpenter L, Hanrahan P. 1988 Volume rendering. *ACM Siggraph*  
209 *Computer Graphics* **22**:65-74.
- 210 11. Upson C, Faulhaber T, Kamins D, Laidlaw D, Schlegel D, Vroom J, et al.  
211 1989 The application visualization system: A computational environment for  
212 scientific visualization. *IEEE Computer Graphics and Applications* **9**:30-42. (doi:  
213 10.1109/38.31462)
- 214 12. Westover L. 1990 Footprint evaluation for volume rendering. *Proceedings of*  
215 *the 17th annual conference on Computer graphics and interactive techniques*. Dallas,  
216 TX, USA: Association for Computing Machinery; 1990. p.367–376. (doi:  
217 10.1145/97879.97919)
- 218 13. Hall PM, Watt AH. 1991 Rapid volume rendering using a boundary-fill  
219 guided ray cast algorithm. In: *Patrikalakis N.M. (eds) Scientific Visualization of*  
220 *Physical Phenomena*. Springer, Tokyo. p. 235-249. (doi: 10.1007/978-4-431-68159-  
221 5\_13)
- 222 14. Cabral B, Cam N, Foran J.1994 Accelerated volume rendering and  
223 tomographic reconstruction using texture mapping hardware. In: *Proceedings of the*  
224 *1994 symposium on Volume visualization*. p. 91-98. (doi: 10.1145/197938.197972)
- 225 15. Lacroute P, Levoy M. 1994 Fast volume rendering using a shear-warp  
226 factorization of the viewing transformation. In: *Proceedings of the 21st annual*  
227 *conference on Computer graphics and interactive techniques*. p.451-458. (doi:  
228 10.1145/192161.192283)
- 229 16. Manssour IH, Furuie SS, Olabarriaga SD, Freitas CM. 2002 Visualizing inner  
230 structures in multimodal volume data. In: *Proceedings XV Brazilian Symposium on*  
231 *Computer Graphics and Image Processing IEEE*. (doi:  
232 10.1109/SIBGRA.2002.1167123)

- 233 17. Johnson C. 2004 Top scientific visualization research problems. *IEEE*  
234 *Computer Graphics and Applications* **24**:13-17. (doi:10.1109/MCG.2004.20)
- 235 18. Latham SJ, Varslot T, Sheppard A. 2008 Automated registration for  
236 augmenting micro-CT 3D images. *Anziam Journal* **50**:534-548.(doi:  
237 10.21914/anziamj.v50i0.1389)
- 238 19. Brodlie KW, Carpenter LA, Earnshaw RA, Gallop JR, Hubbold RJ, Mumford  
239 AM, et al. 2012 Scientific visualization: techniques and applications. Springer  
240 Science & Business Media.
- 241 20. Lakare S, Kaufman A. 2000 3D segmentation techniques for medical volumes.  
242 Center for Visual Computing, Department of Computer Science, State University of  
243 New York. 2000:59-68.
- 244 21. Kaur D, Kaur Y. 2014 Various image segmentation techniques: a review.  
245 *International Journal of Computer Science and Mobile Computing* **3**:809-814.
- 246 22. Carvalho LE, Sobieranski AC, von Wangenheim A. 2018 3D Segmentation  
247 Algorithms for Computerized Tomographic Imaging: a Systematic Literature Review.  
248 *Journal of digital imaging* **31**:799-850. (doi: 10.1007/s10278-018-0101-z)
- 249 23. Limaye A. 2012 Drishti: a volume exploration and presentation tool. In:  
250 *Developments in X-ray Tomography VIII* 2012 Oct 17 (Vol. 8506, p. 85060X).  
251 International Society for Optics and Photonics. (doi: 10.1117/12.935640.short?SSO=1)
- 252 24. Cunningham JA, Rahman IA, Lautenschlager S, Rayfield EJ, Donoghue PCJ.  
253 2014 A virtual world of paleontology. *Trends in Ecology & Evolution* **29**:347-357.  
254 (doi: 10.1016/j.tree.2014.04.004)
- 255 25. Johnson EH, Carter AM. 2019 Defossilization: A Review of 3D Printing in  
256 Experimental Paleontology. *Frontiers in Ecology and Evolution* **7**: 430. (doi:  
257 10.3389/fevo.2019.00430)

- 258 26. Sutton M, Rahman I, Garwood R. 2017 VIRTUAL PALEONTOLOGY—AN  
259 OVERVIEW. *The Paleontological Society Papers* **22**:1-20. (doi:10.1017/scs.2017.5)
- 260 27. Hu Y-Z, Lu J, Young GC. 2017 New findings in a 400 million-year-old  
261 Devonian placoderm shed light on jaw structure and function in basal gnathostomes.  
262 *Scientific Reports* **7**:1-12. (doi:10.1038/s41598-017-07674-y)
- 263 28. Hu Y-Z, Young GC, Burrow C, Zhu Y-A, Lu J. 2019 High resolution XCT  
264 scanning reveals complex morphology of gnathal elements in an Early Devonian  
265 arthrodire. *Palaeoworld* **28**:525-534. (doi:10.1016/j.palwor.2018.12.003)
- 266 29. Myers GR, Kingston AM, Varslot TK, Turner ML, Sheppard AP. 2011  
267 Dynamic tomography with a priori information. *Appl. Opt.* **50**:3685-3690. (doi:  
268 10.1364/AO.50.003685)
- 269 30. Hu Y-Z, Young GC, Lu J. 2019 The Upper Devonian tetrapodomorph  
270 *Gogonassus andrewsae* from Western Australia: Reconstruction of the shoulder girdle  
271 and opercular series using X-ray Micro-Computed Tomography. *Palaeoworld*  
272 **28**:535-542. (doi:10.1016/j.palwor.2019.07.008)
- 273 31. Tesařová M, Heude E, Comai G, Zikmund T, Kaucká M, Adameyko I, et al.  
274 2019 An interactive and intuitive visualisation method for X-ray computed  
275 tomography data of biological samples in 3D Portable Document Format. *Scientific*  
276 *Reports* **9**:1-8. (doi:10.1038/s41598-019-51180-2)
- 277 32. Cignoni P, Callieri M, Corsini M, Dellepiane M, Ganovelli F, Ranzuglia G.  
278 2008 Meshlab: an open-source mesh processing tool. In: *Eurographics Italian chapter*  
279 *conference* 2008. p. 129-136.

280

281 **Figure legends**

282 **Figure 1.** The general workflow for operating *Drishti* v2.6.6. Data formats in this  
283 figure are only abbreviations, for detailed information please refer to Supplementary  
284 Table 1.

285 **Figure 2.** Extract a 3D virtual volumetric model in *Drishti*. A. Raw data of the right  
286 cheek complex of a Devonian placoderm fish (ANU V244) in *Drishti Import* v2.6.6.  
287 B. V244 in *Drishti Render* v2.6.6 in 16 bits full resolution (lateral view). C. Selected  
288 region-of-interest for segmentation. D. Selected region-of-interest in *Drishti Paint*  
289 v2.6.6 for segment the right cheek complex. E. Segmented right cheek complex in  
290 *Drishti Render* v2.6.6 (external view).

291 **Figure 3.** Segmenting internal structures of a toothplate (an Early Devonian  
292 placoderm fish, ANU V244) in *Drishti Paint*. A. Right upper anterior toothplate in  
293 *Drishti Render* v2.6.6 (external view). B. Raw data of the right upper anterior  
294 toothplate in *Drishti Paint* v2.6.6. The white-boxed area shows the selected region-of-  
295 interest on the right upper anterior toothplate for segmentation. C. Segmented outer  
296 surface of the region-of-interest on the right upper anterior toothplate and its internal  
297 canal networks underneath in *Drishti Render* v2.6.6. D. Segmented internal canal  
298 networks with a close-focus in *Drishti Render* v2.6.6.

299 **Figure 4.** 3D surface meshes of the extracted right cheek unit (Devonian placoderm  
300 fish, ANU V244) with attached perichondral-ossified cartilages, showing the  
301 differences of vertex count and file sizes after different mesh simplification  
302 applications. The Vertex count was calculated in MeshLab v1.3.4 [32].

Volumetric data

supporting 13 different  
volumetric data formats

*Drishti Import*  
converts the source data  
into the format (. pvl.nc);  
sub-volume; data cropping;  
data smoothing; data dilution;  
8 or 16 bits data output

.pvl.nc in 8 bits or 16 bits

.pvl.nc in 8 bits or 16 bits

*Drishti Paint*  
2D & 3D segmentation;  
data cropping; sub-volume;  
mesh generation  
& smoothing

.pvl.nc  
in 8 bits  
or 16 bits

*Drishti Render*  
visualization,  
mesh generation  
& simplification,  
volume reslicing  
& smoothing,  
illuminations

.ply

.pvl.nc  
.xml  
.ply

standard/stereo images and movies; 3D printing;  
physical & digital reconstructions; visualization projects



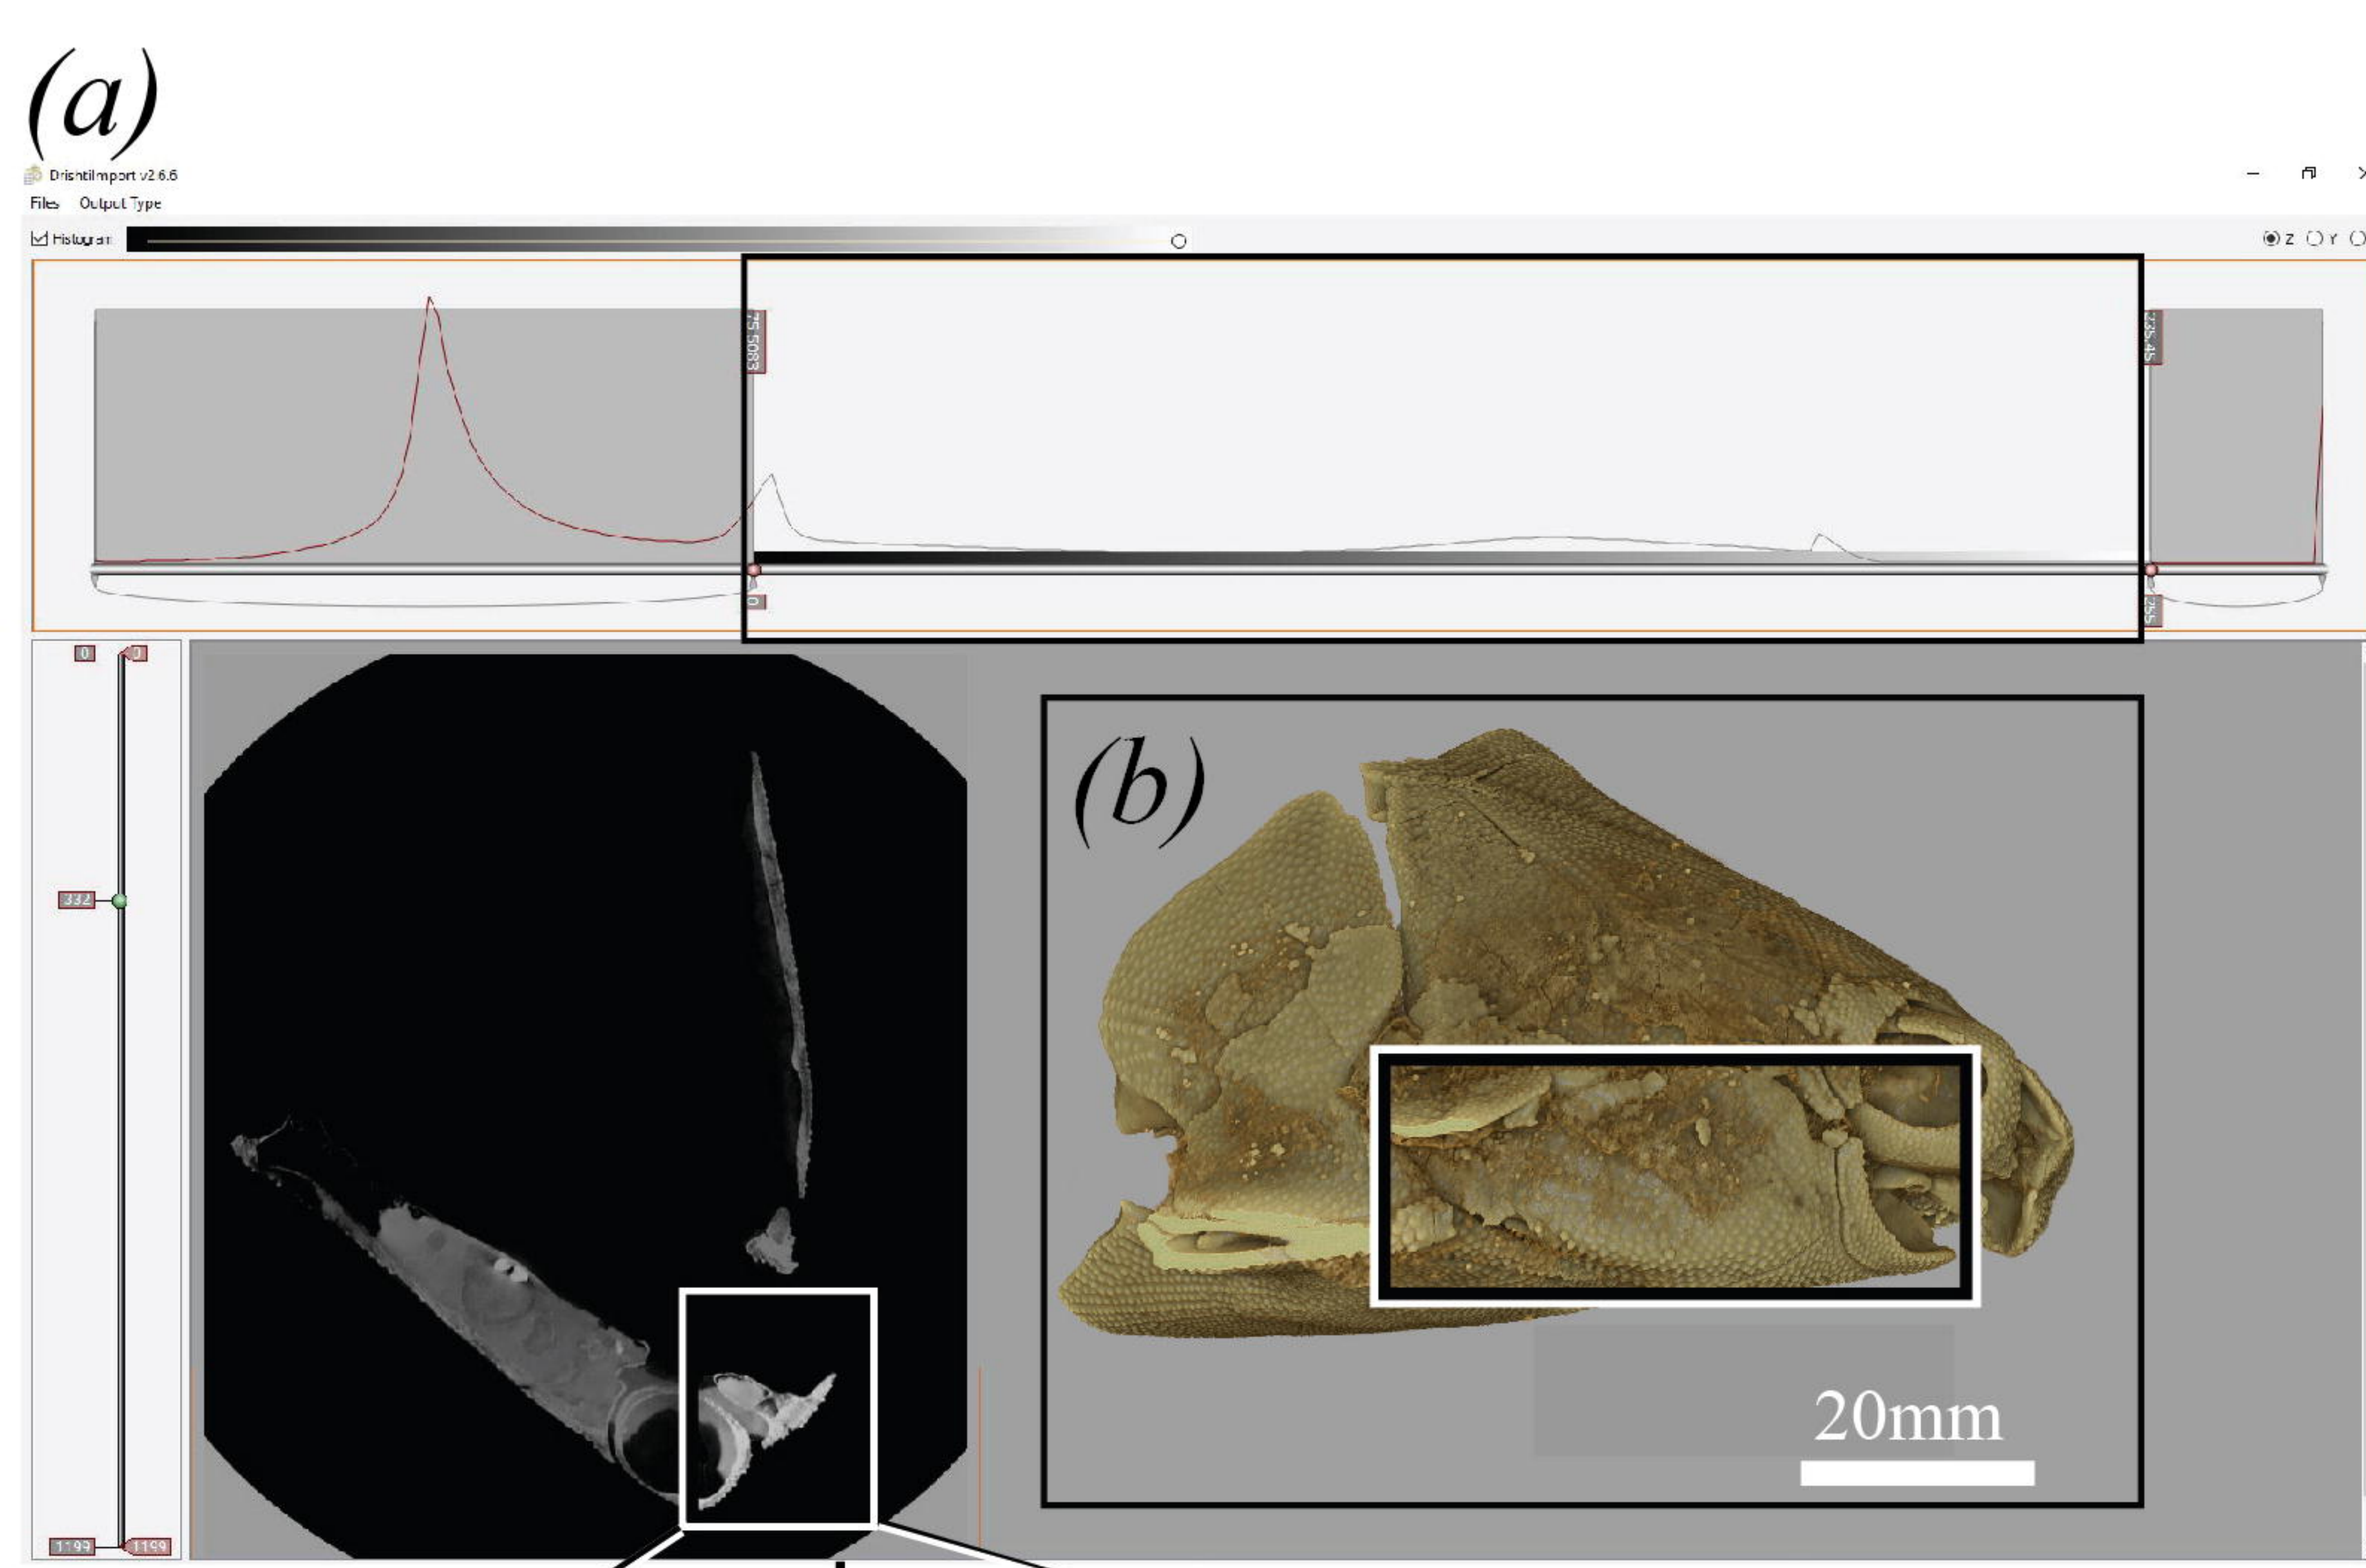

Select the Histogram  
& Region of Interest

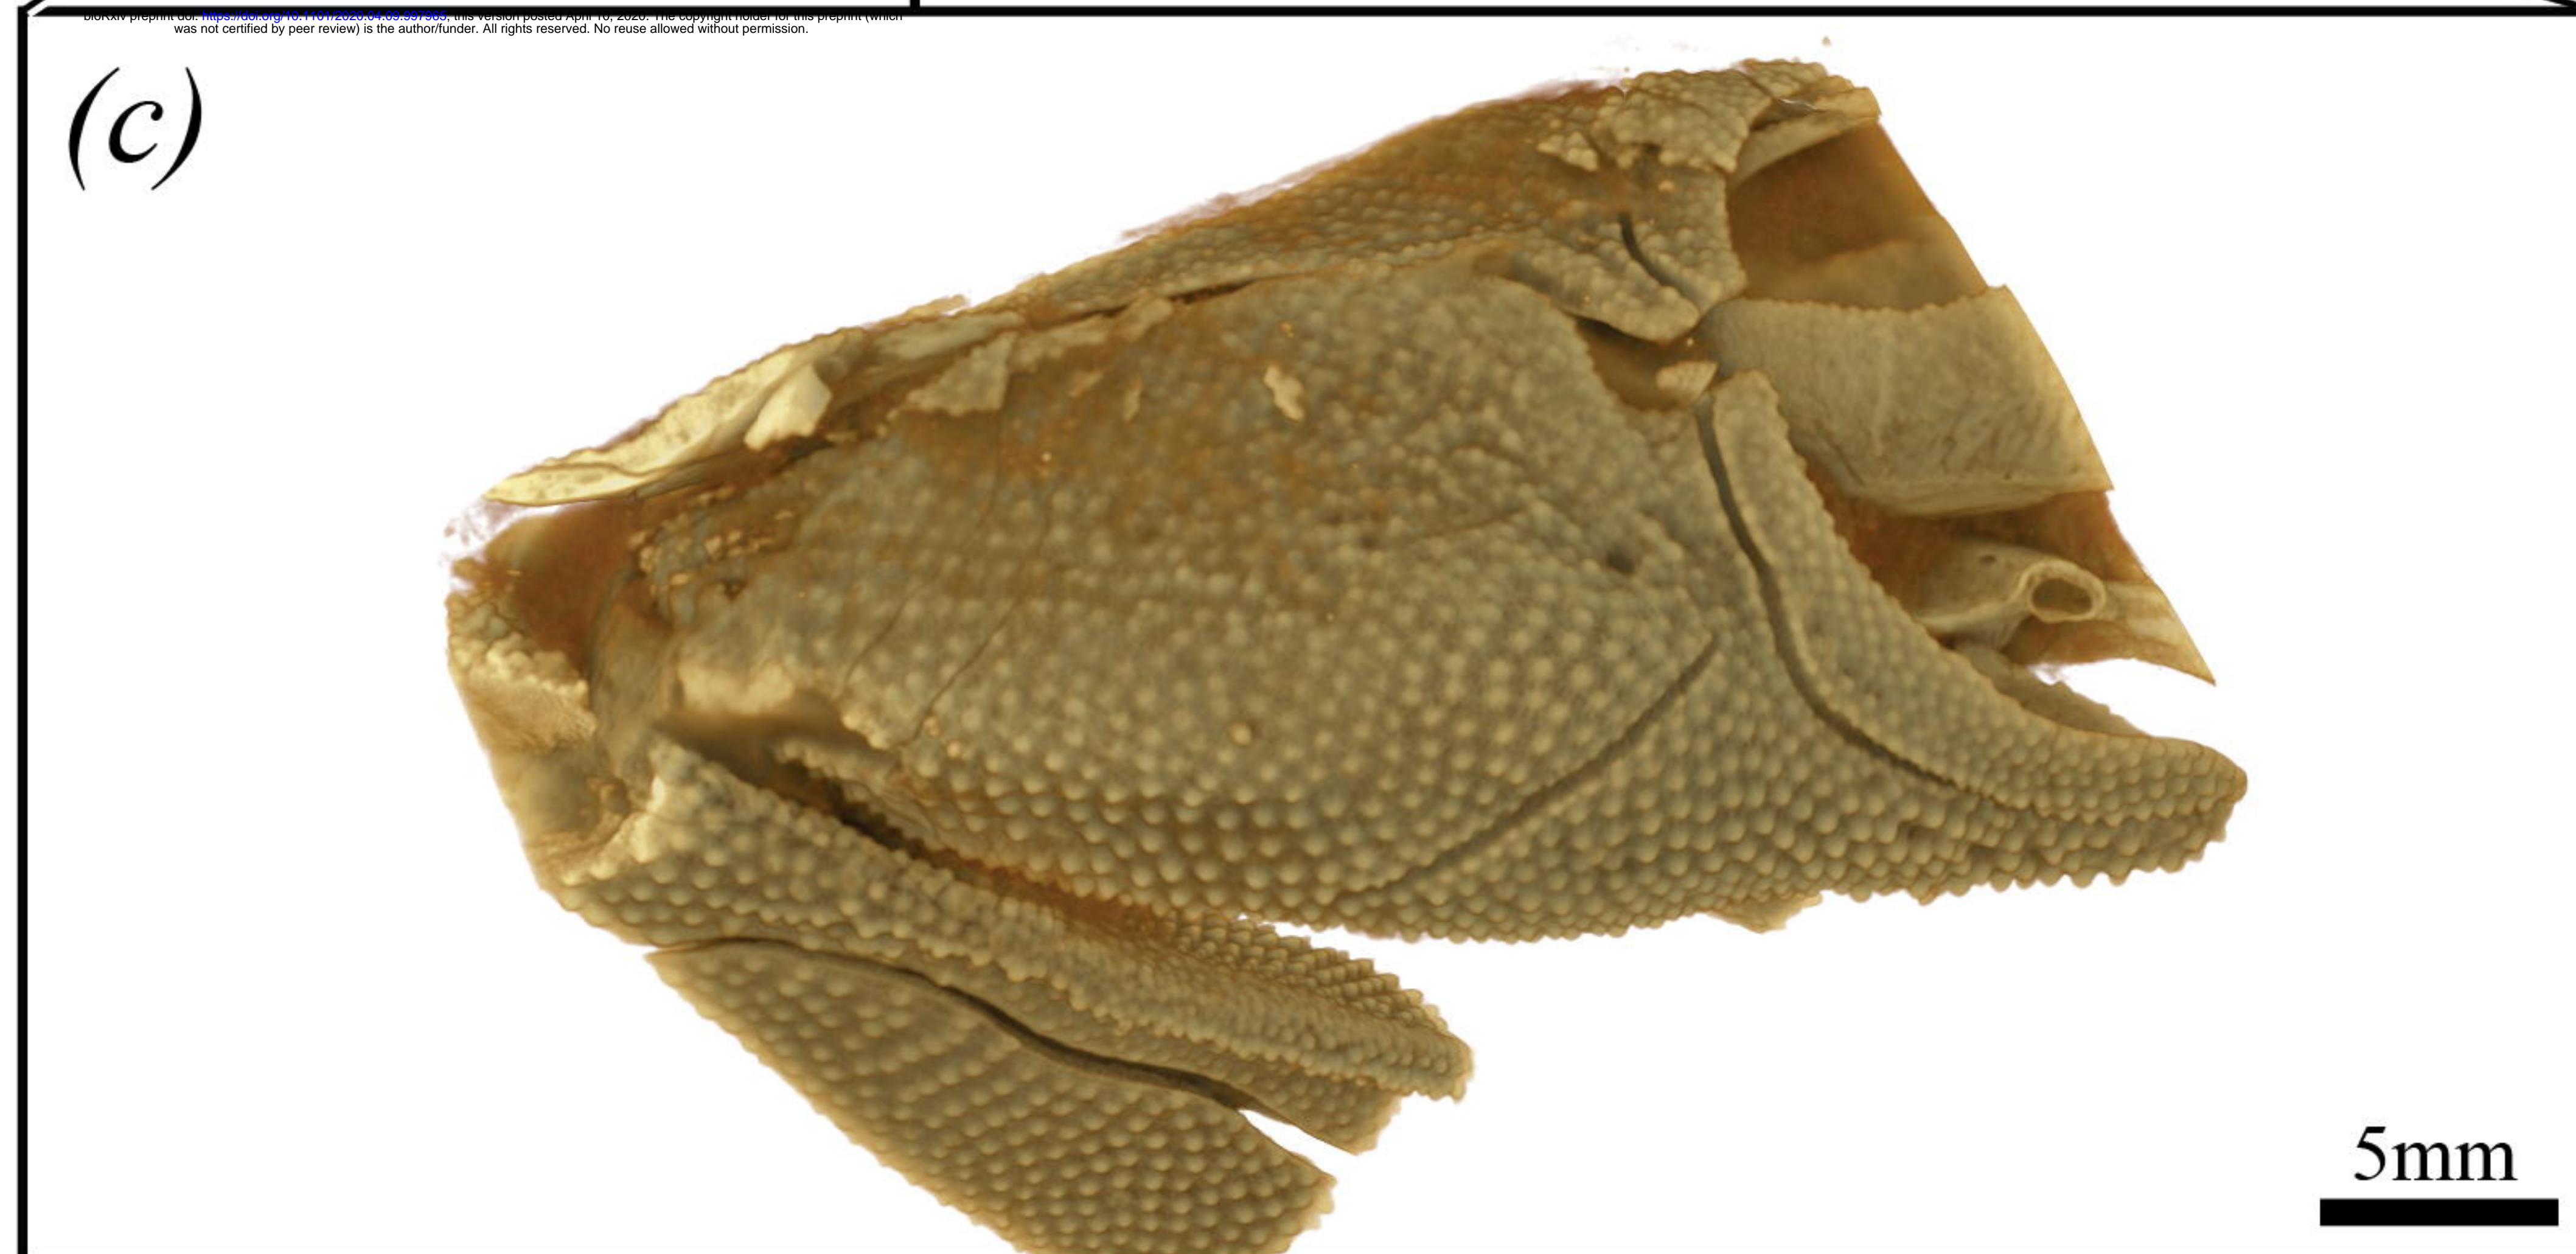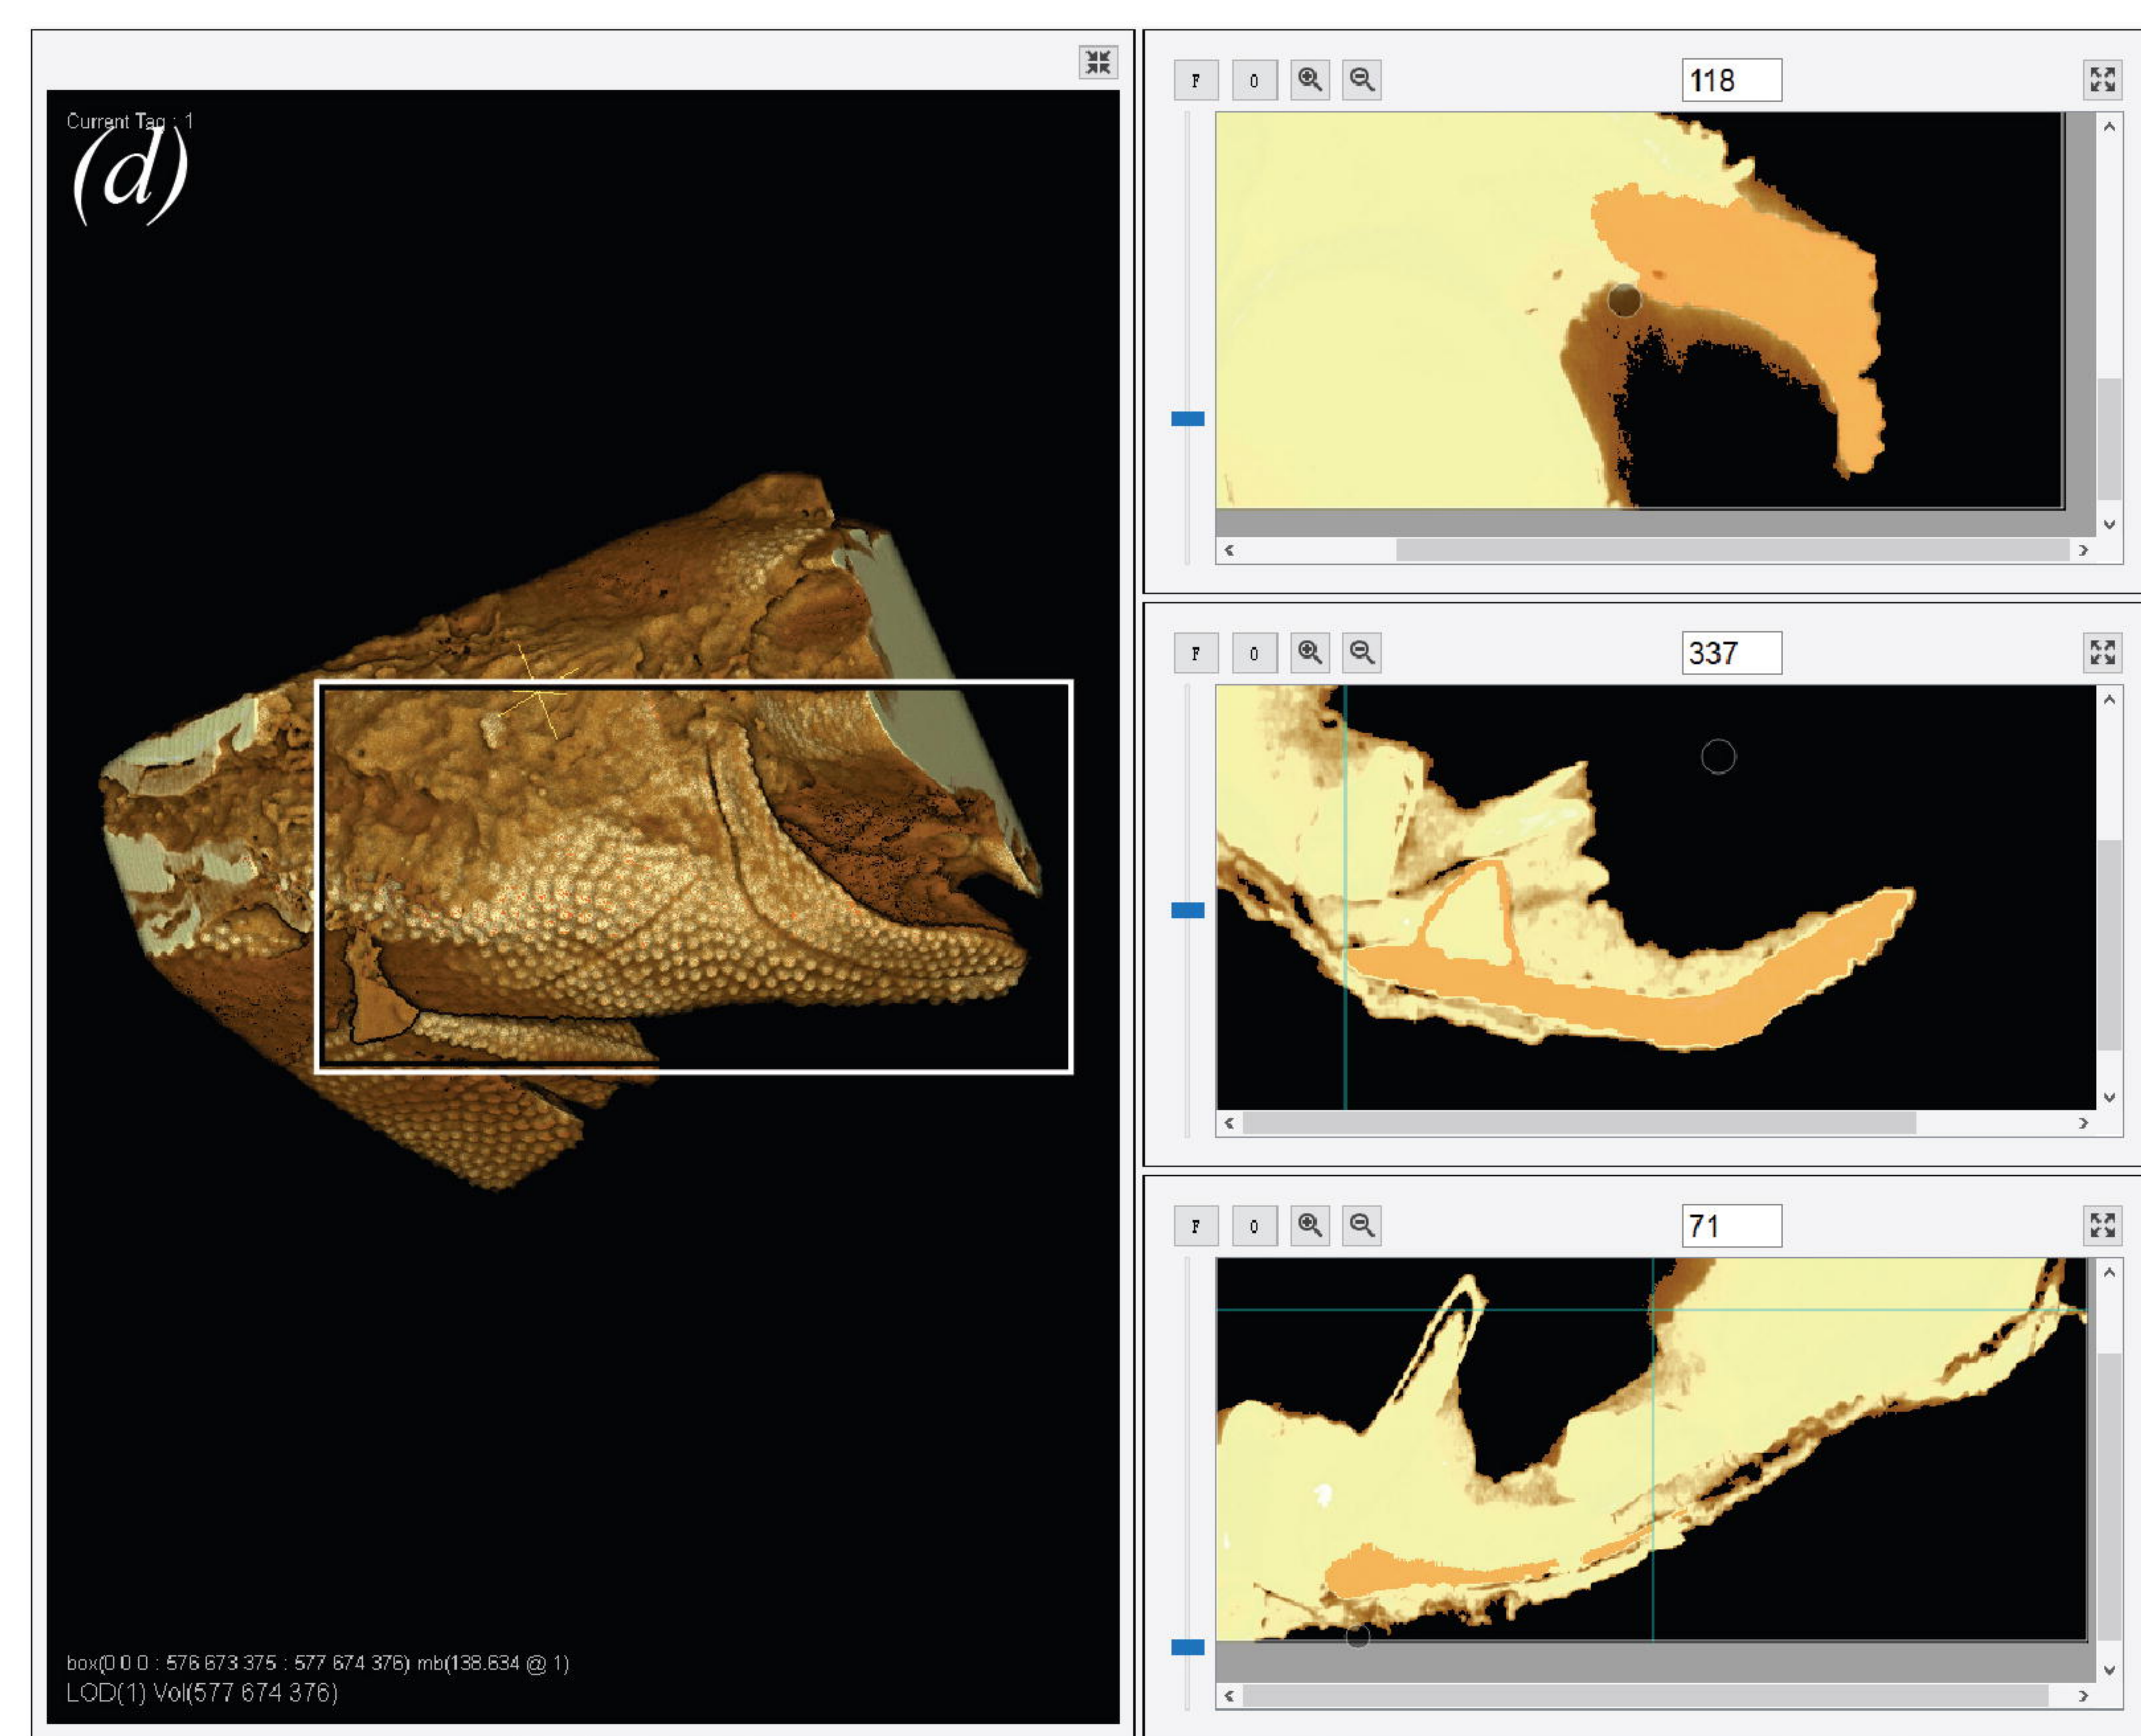

Segmentation

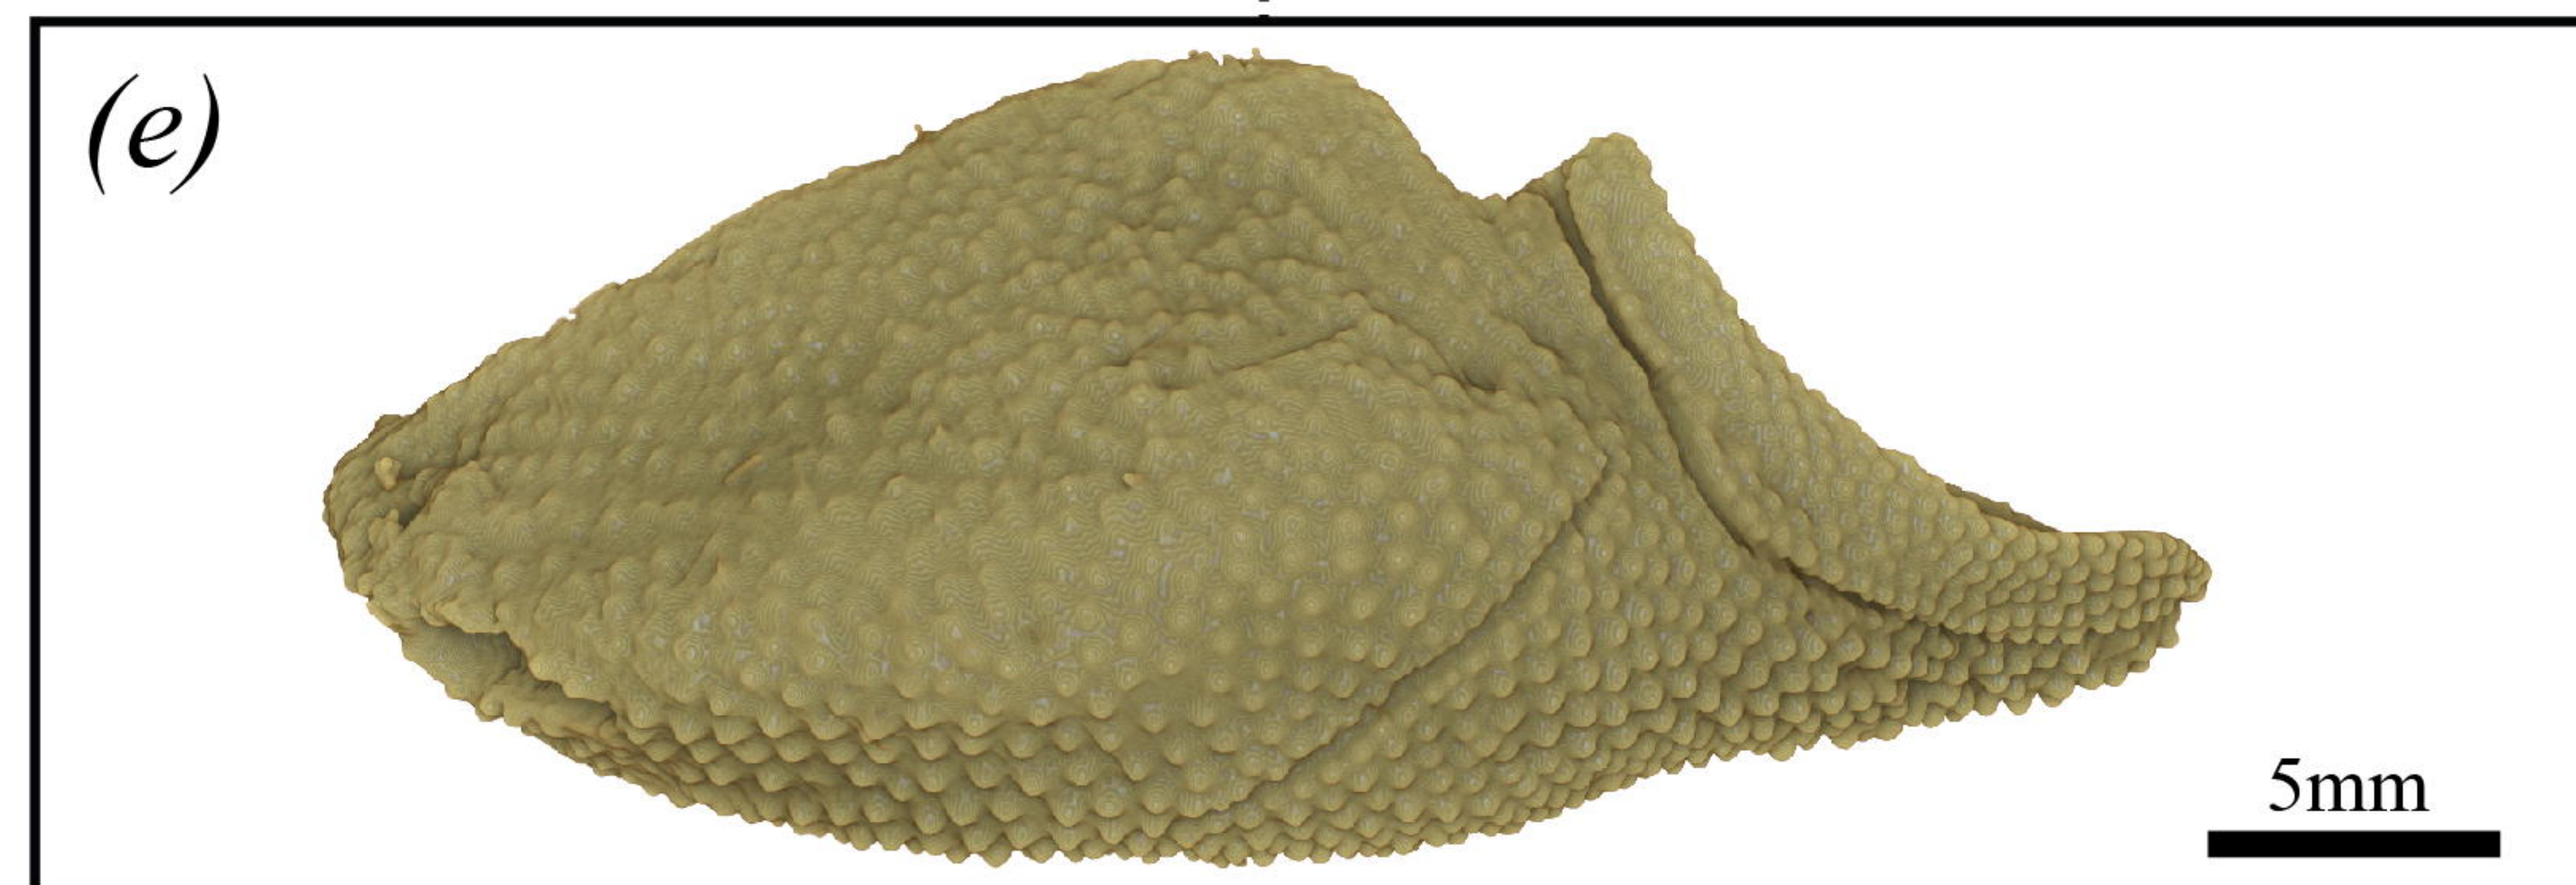



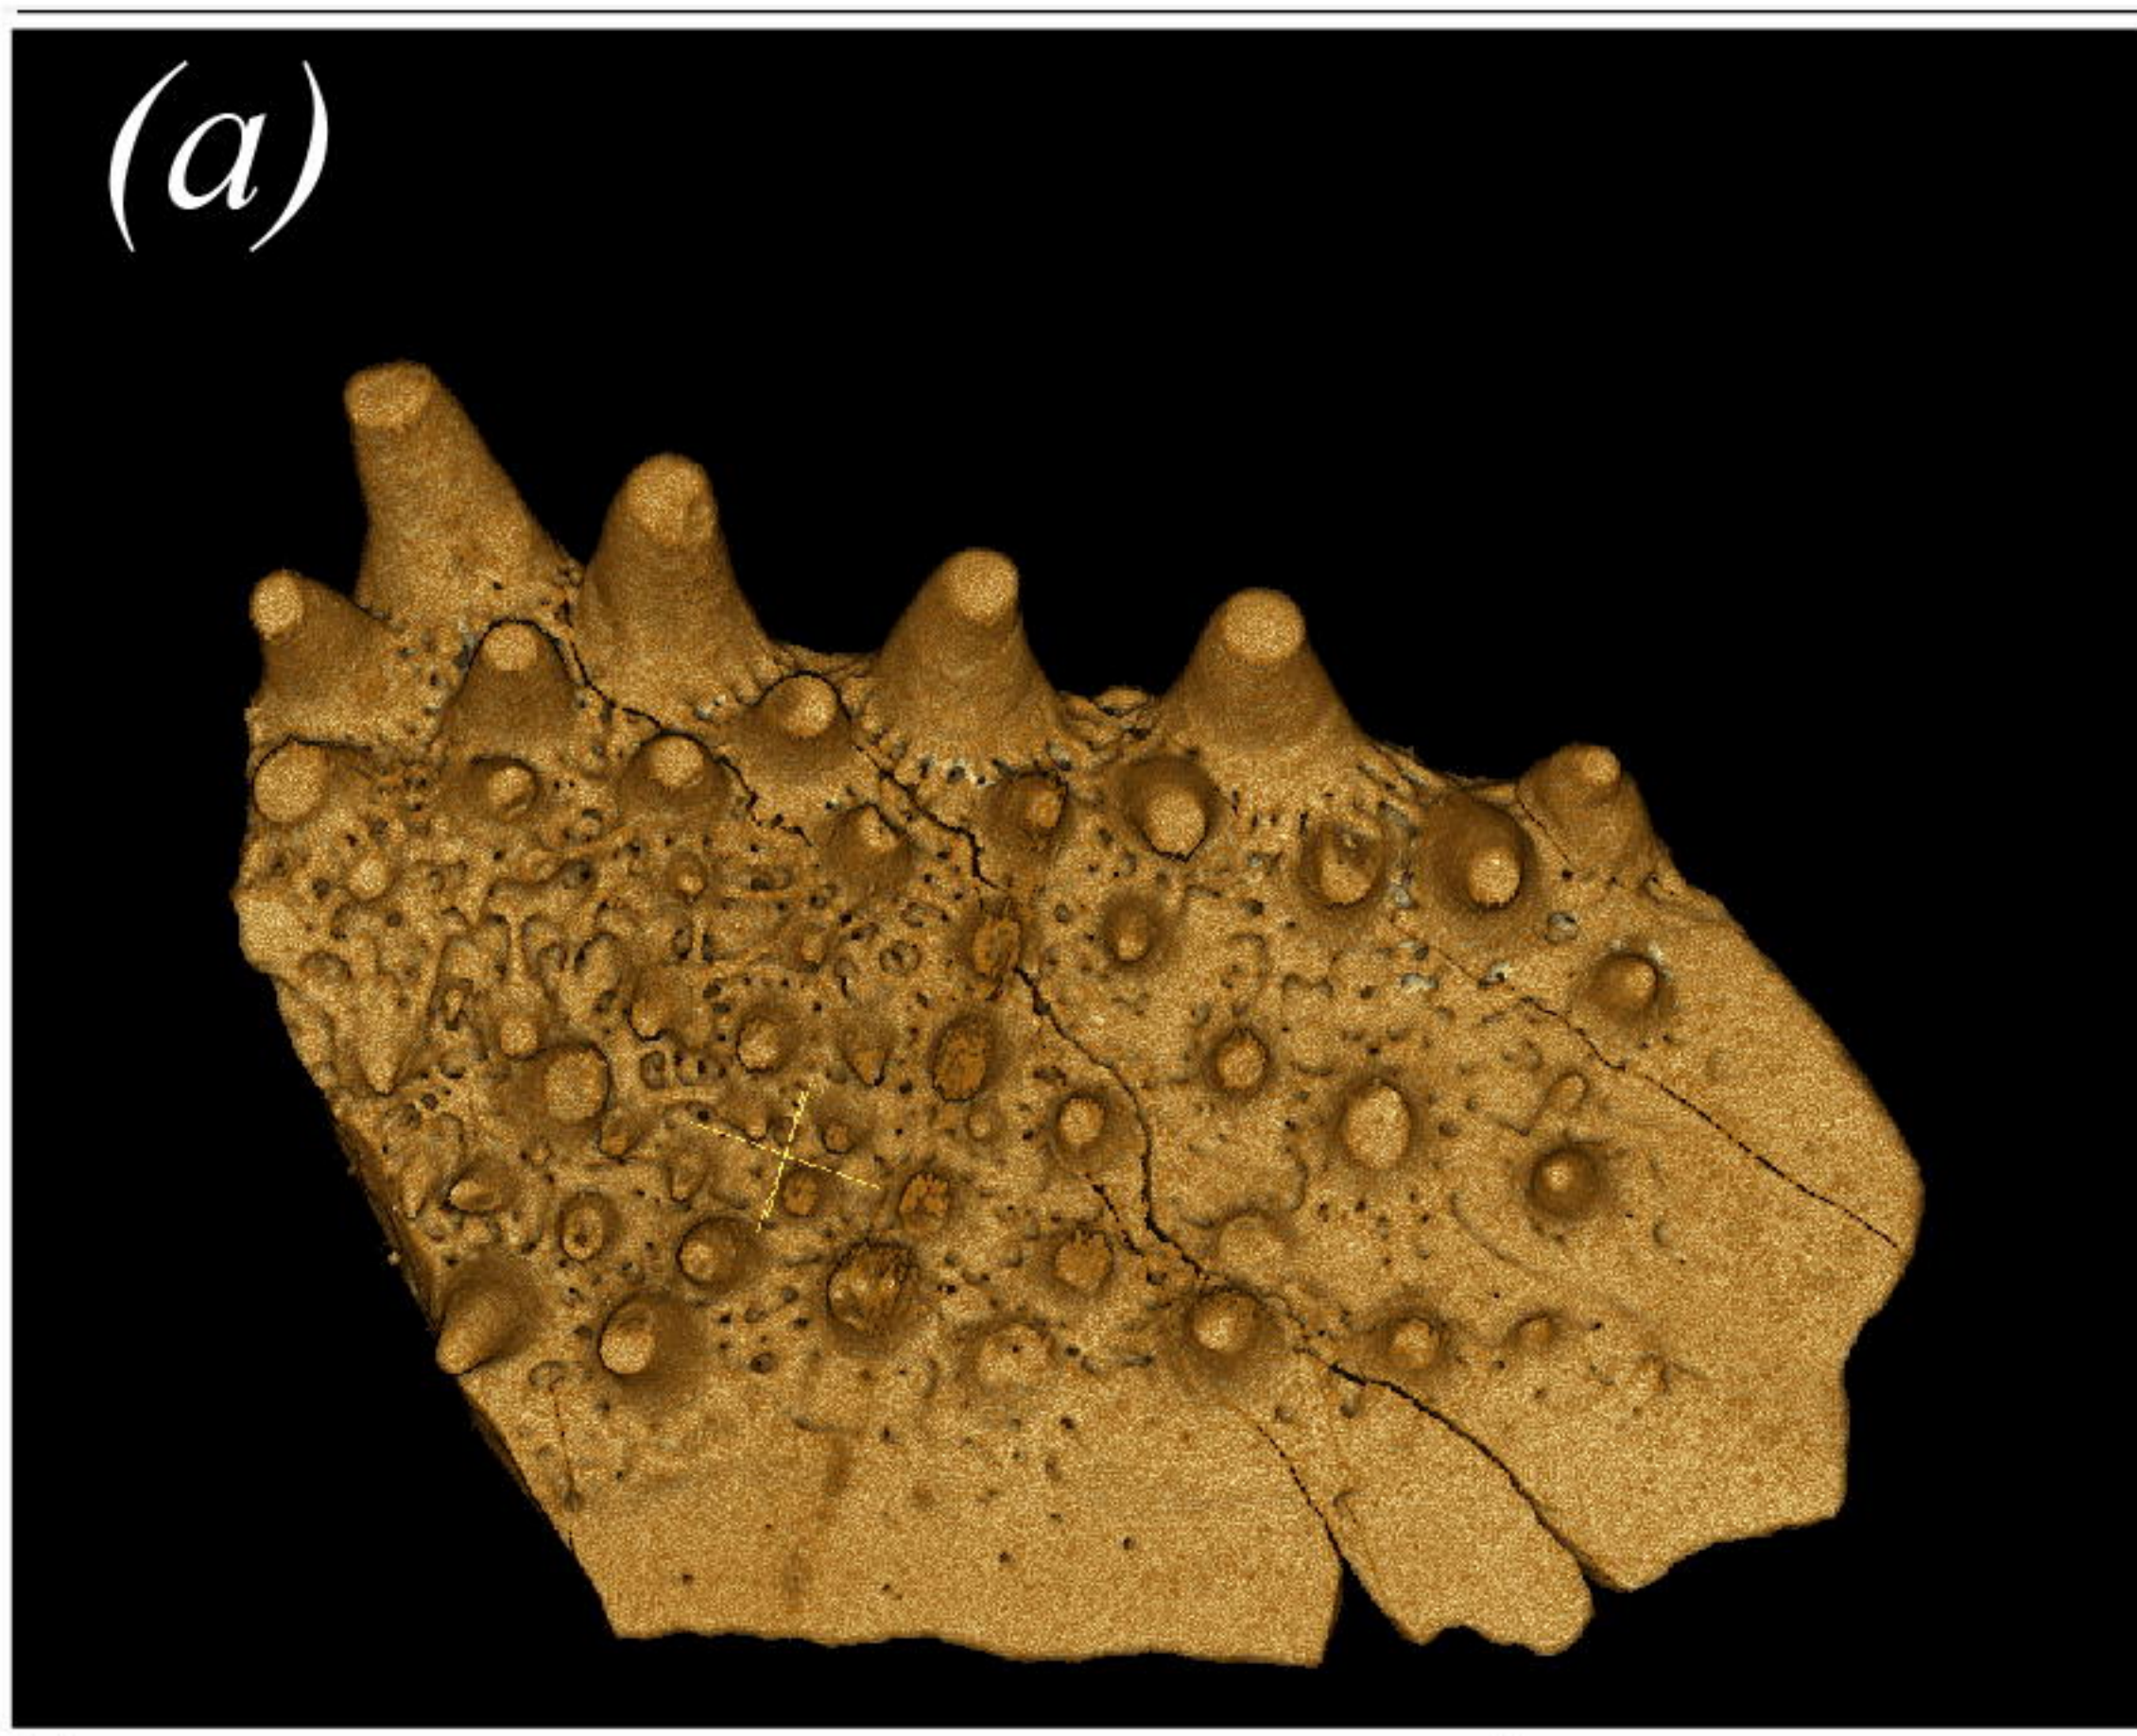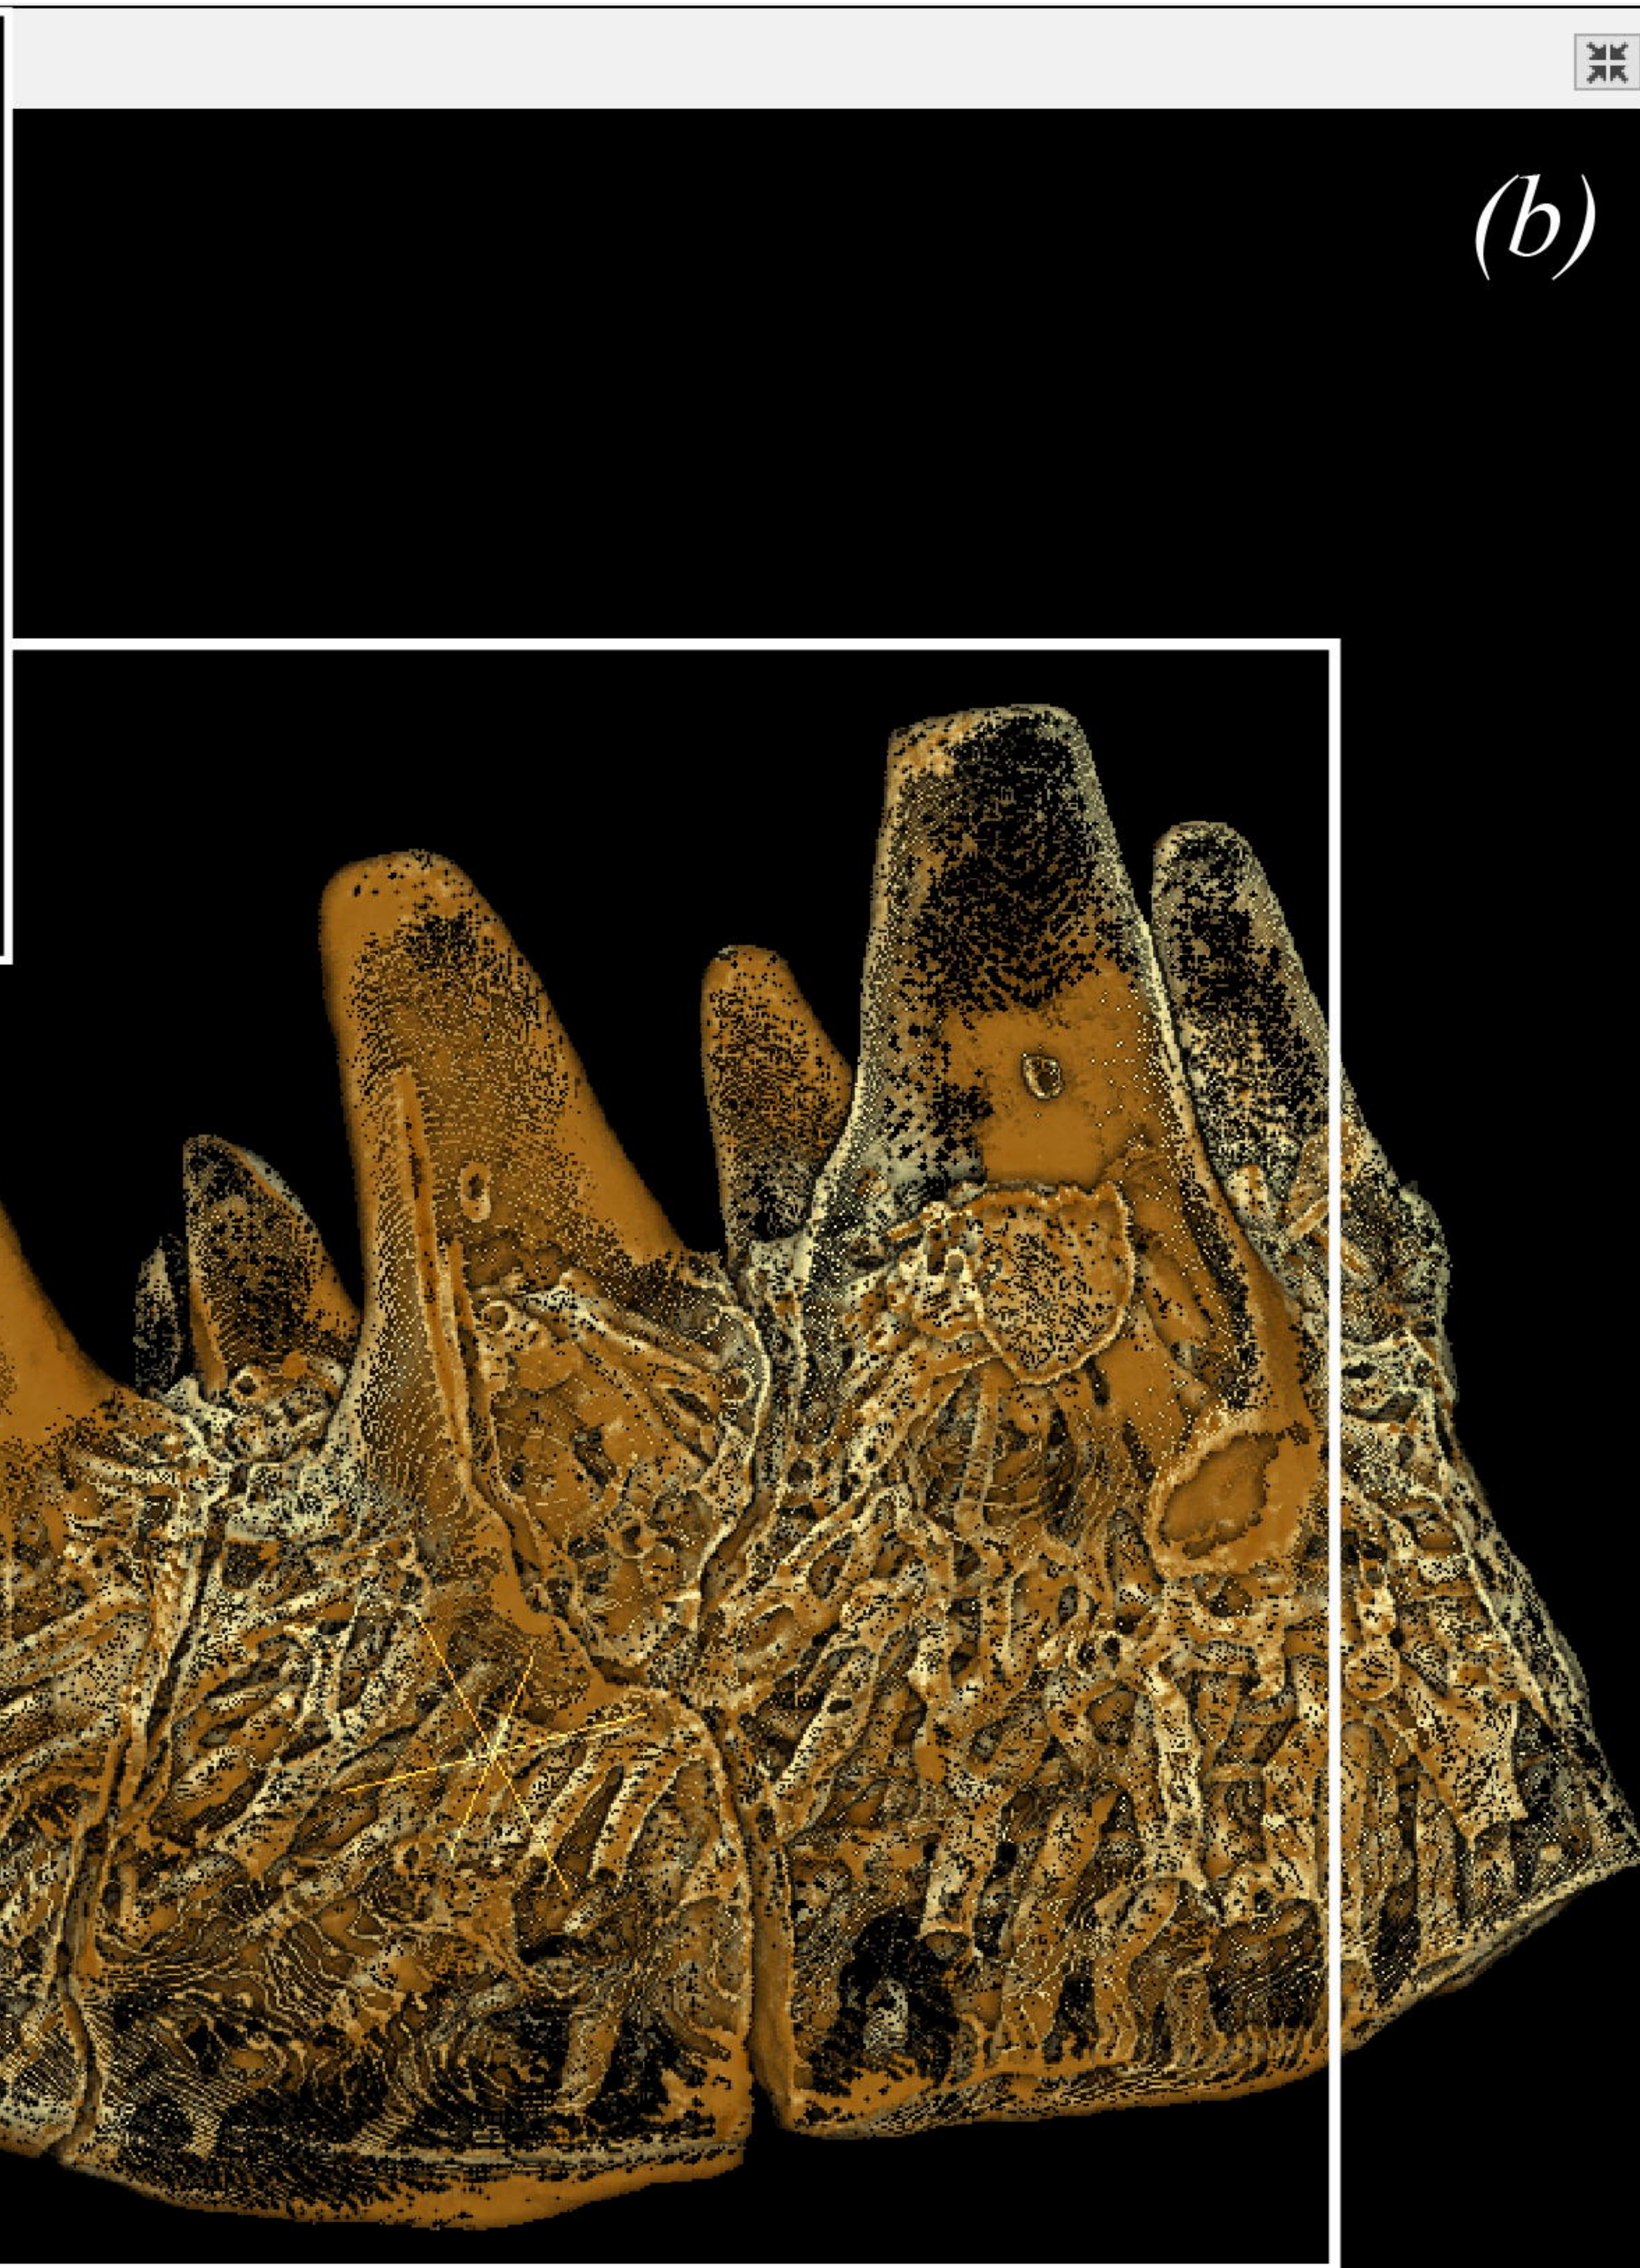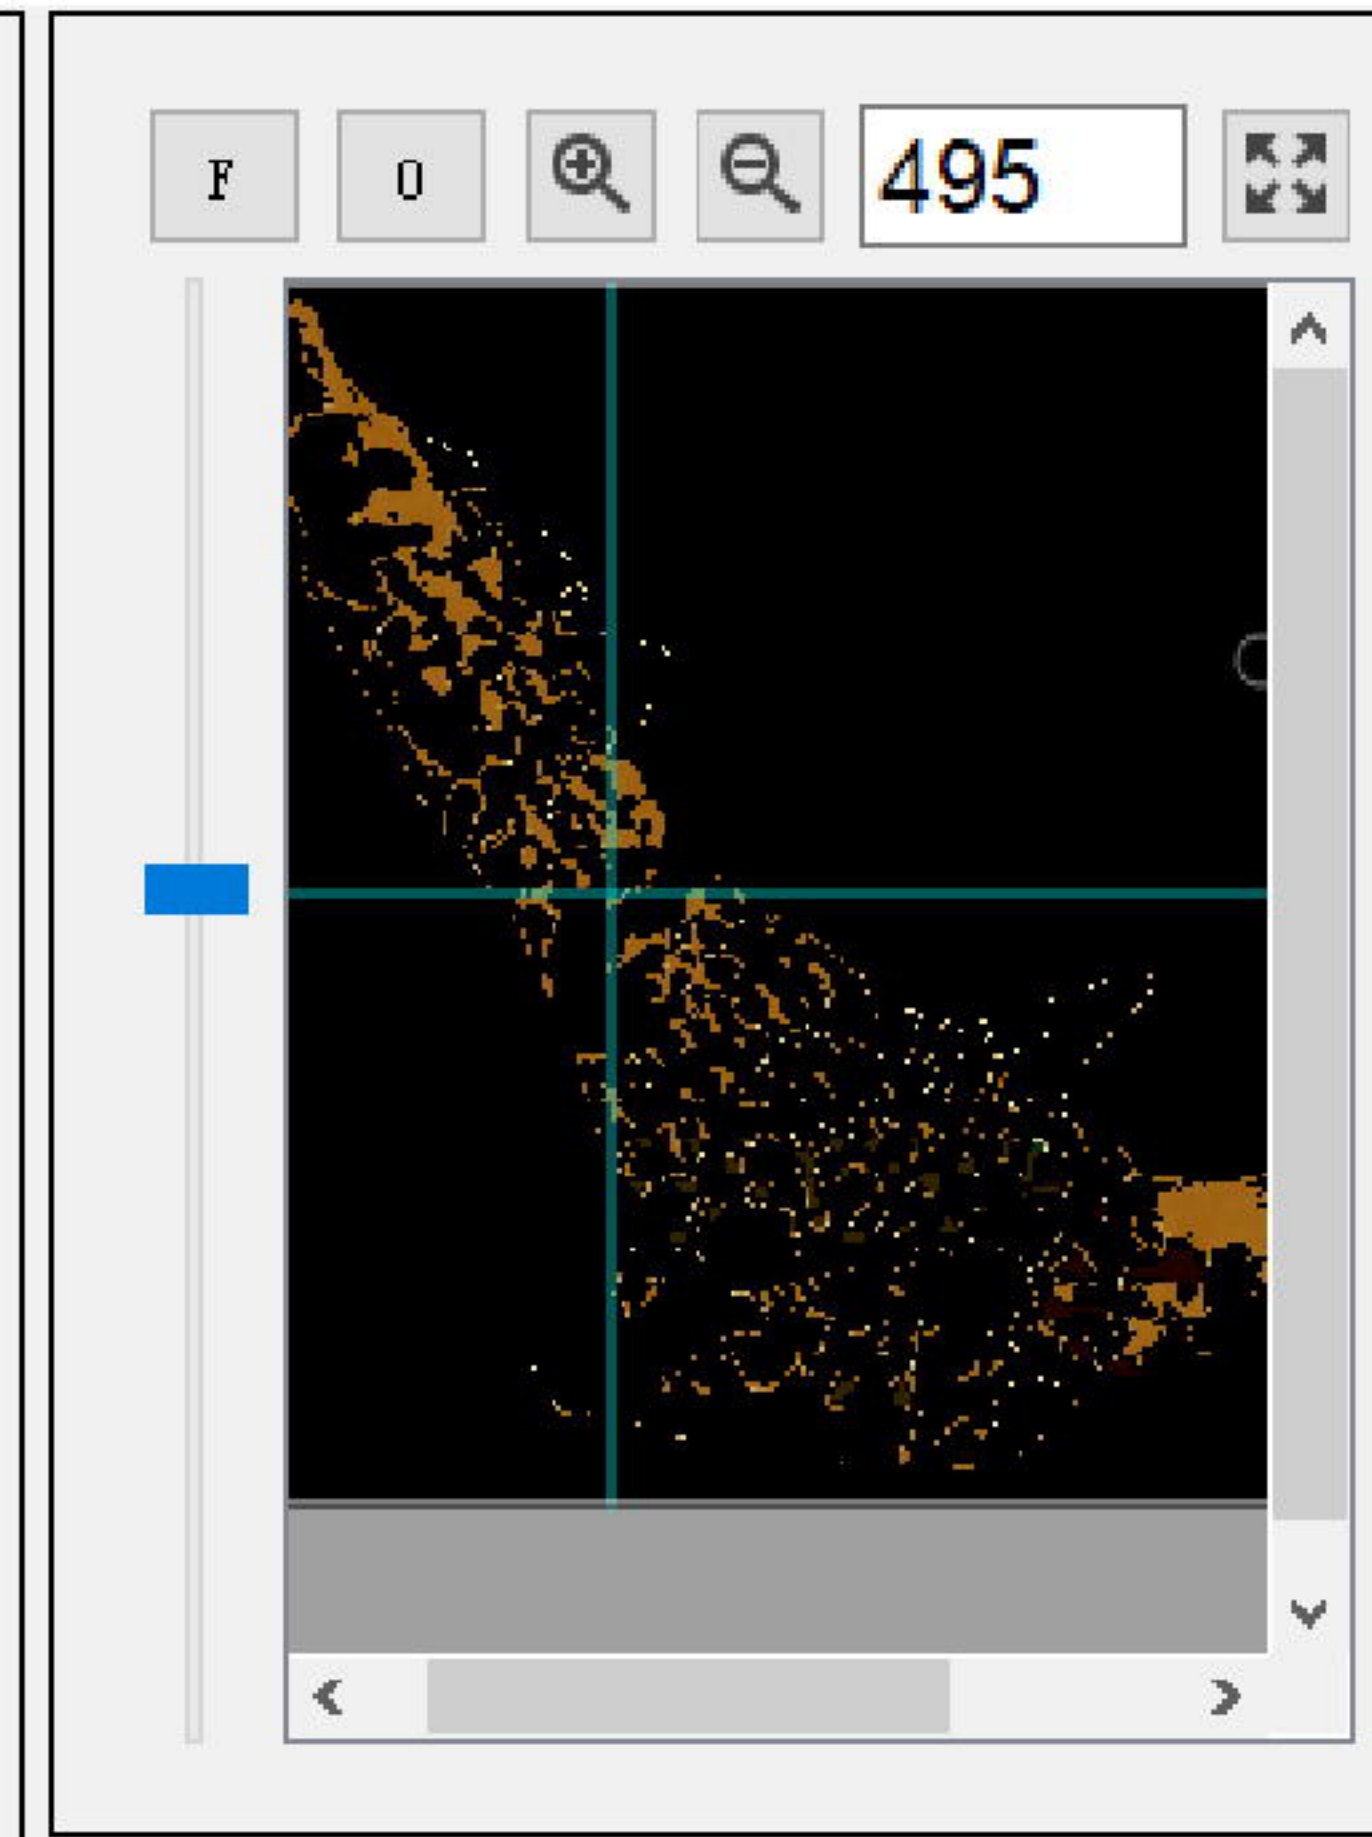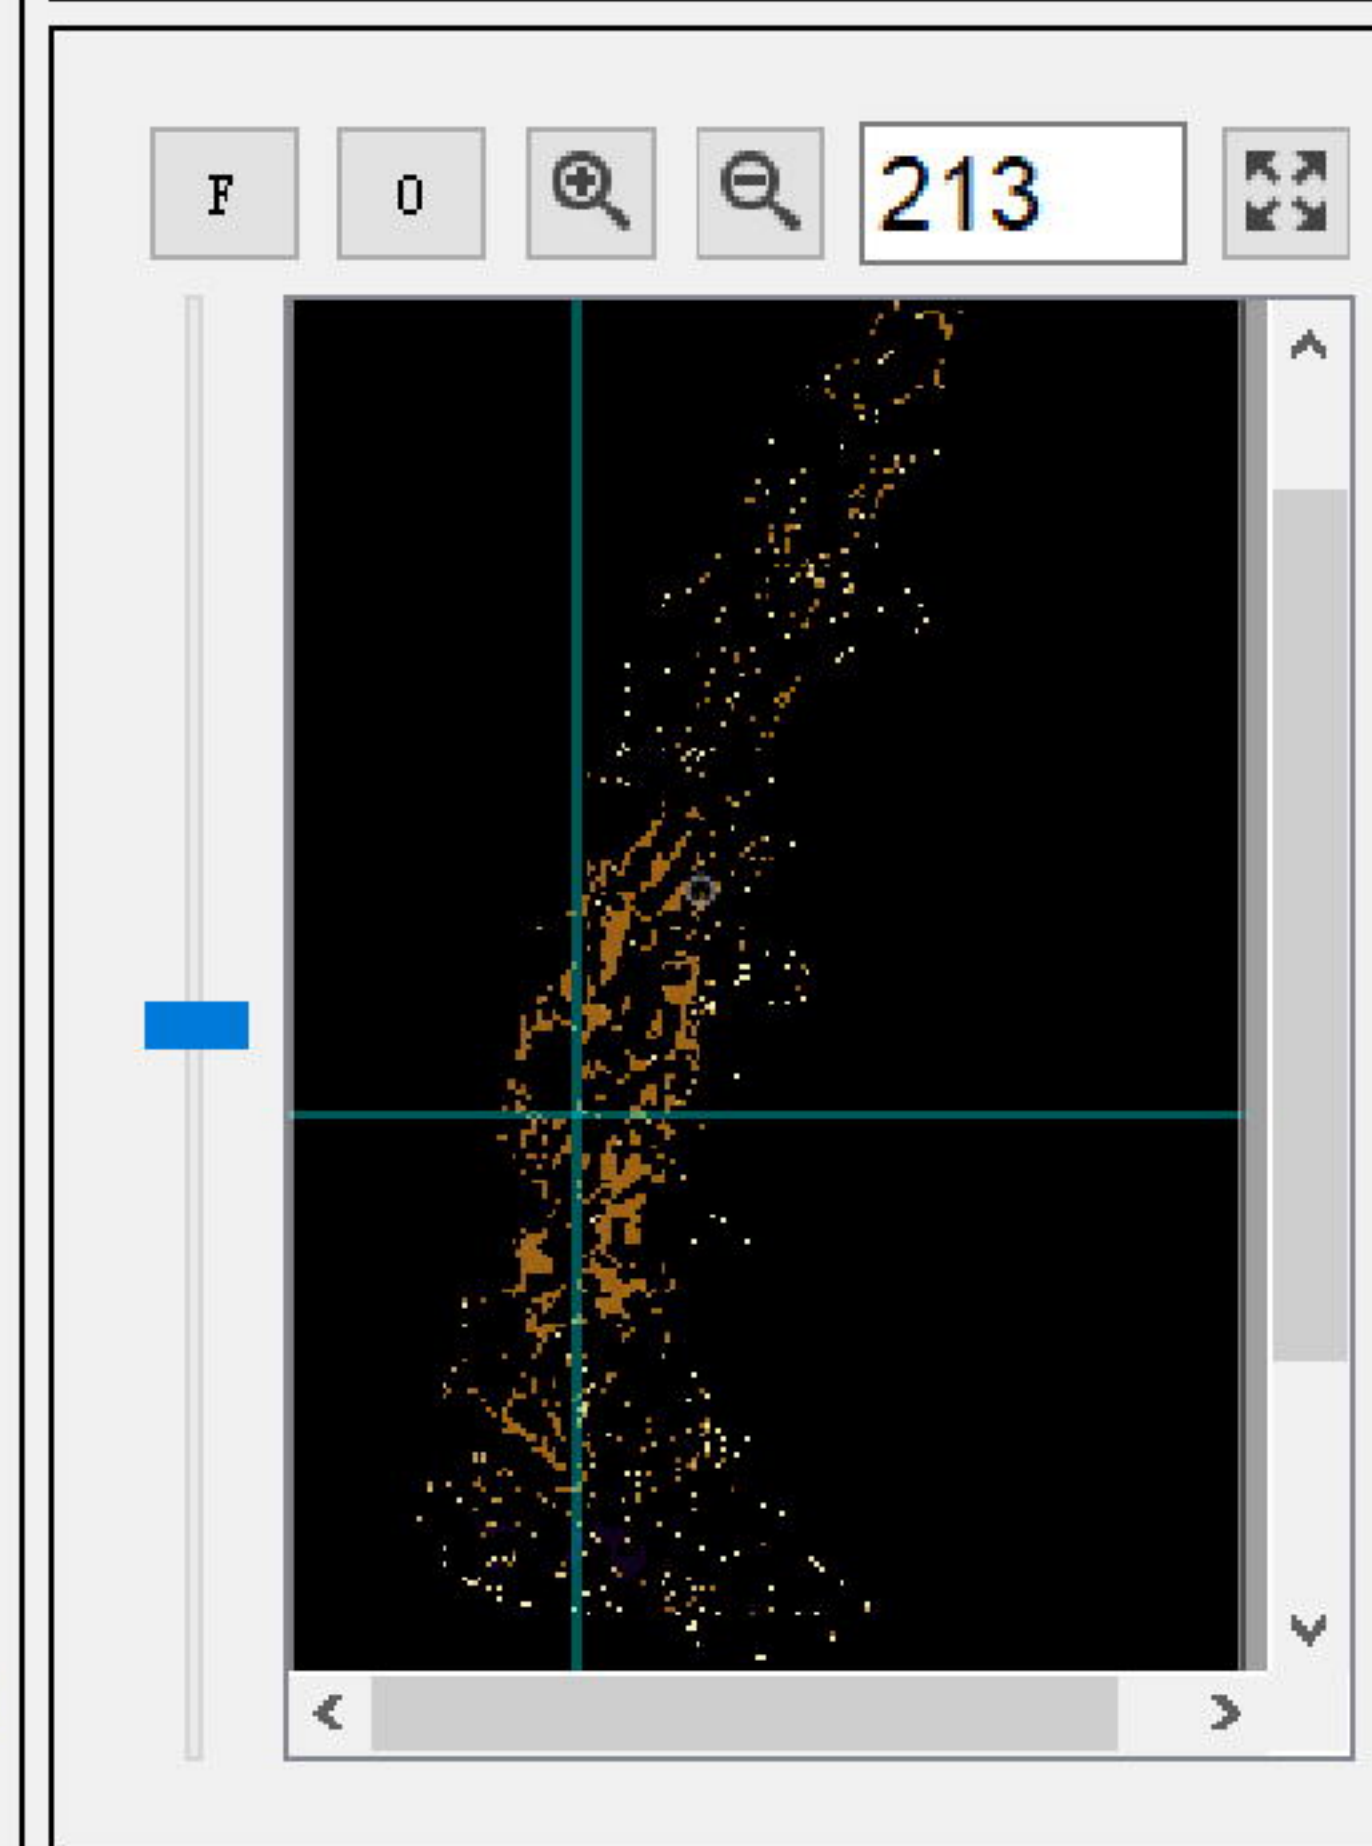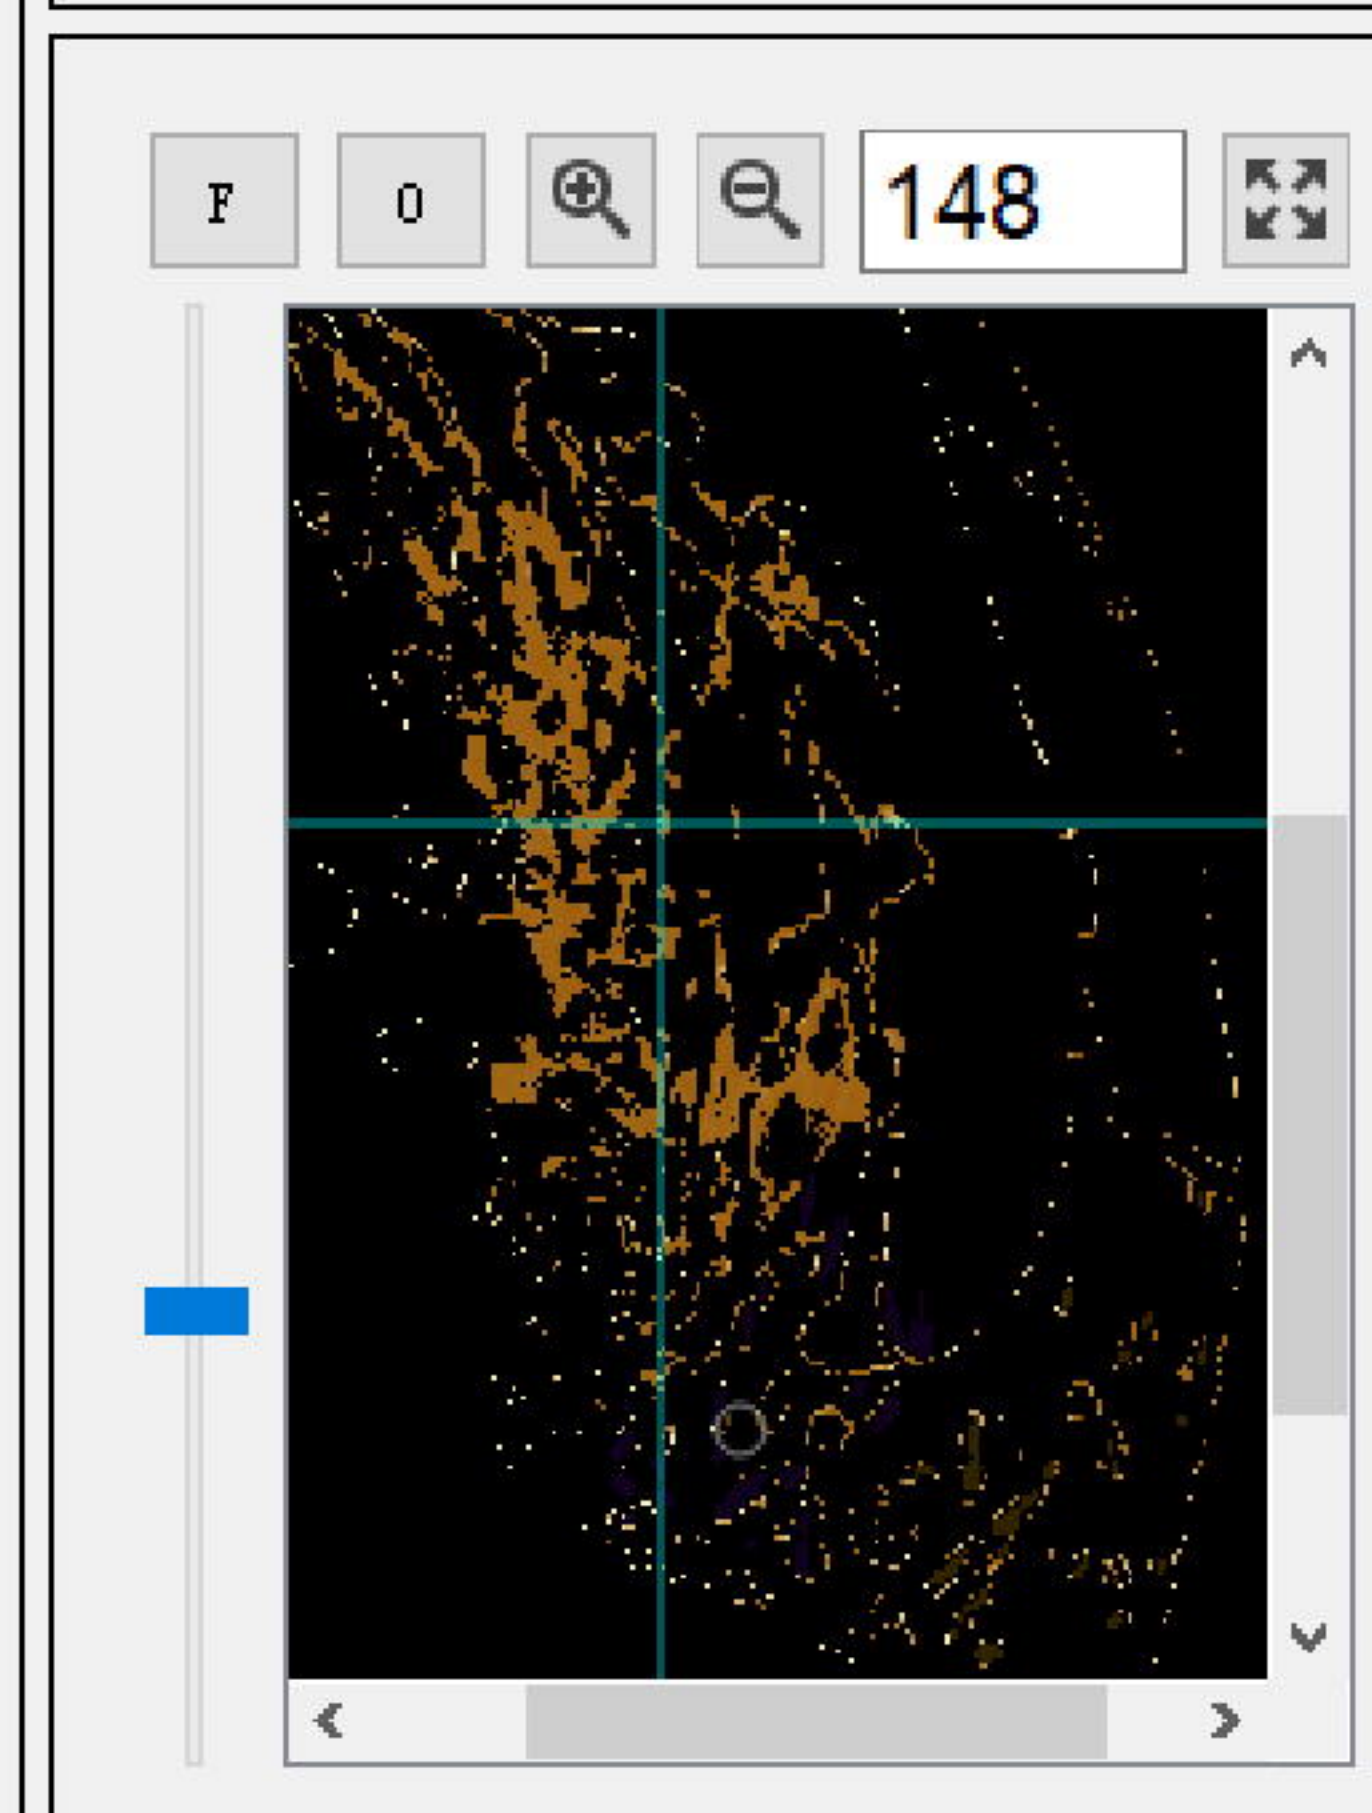

box(0 0 0 : 486 425 849 : 487 426 850) mb(167.237 @ 1)  
LOD(1) Vol(487 426 850)

Extract two volumes- surface of the teeth  
& internal canal networks

Extract one volume-  
internal canal networks

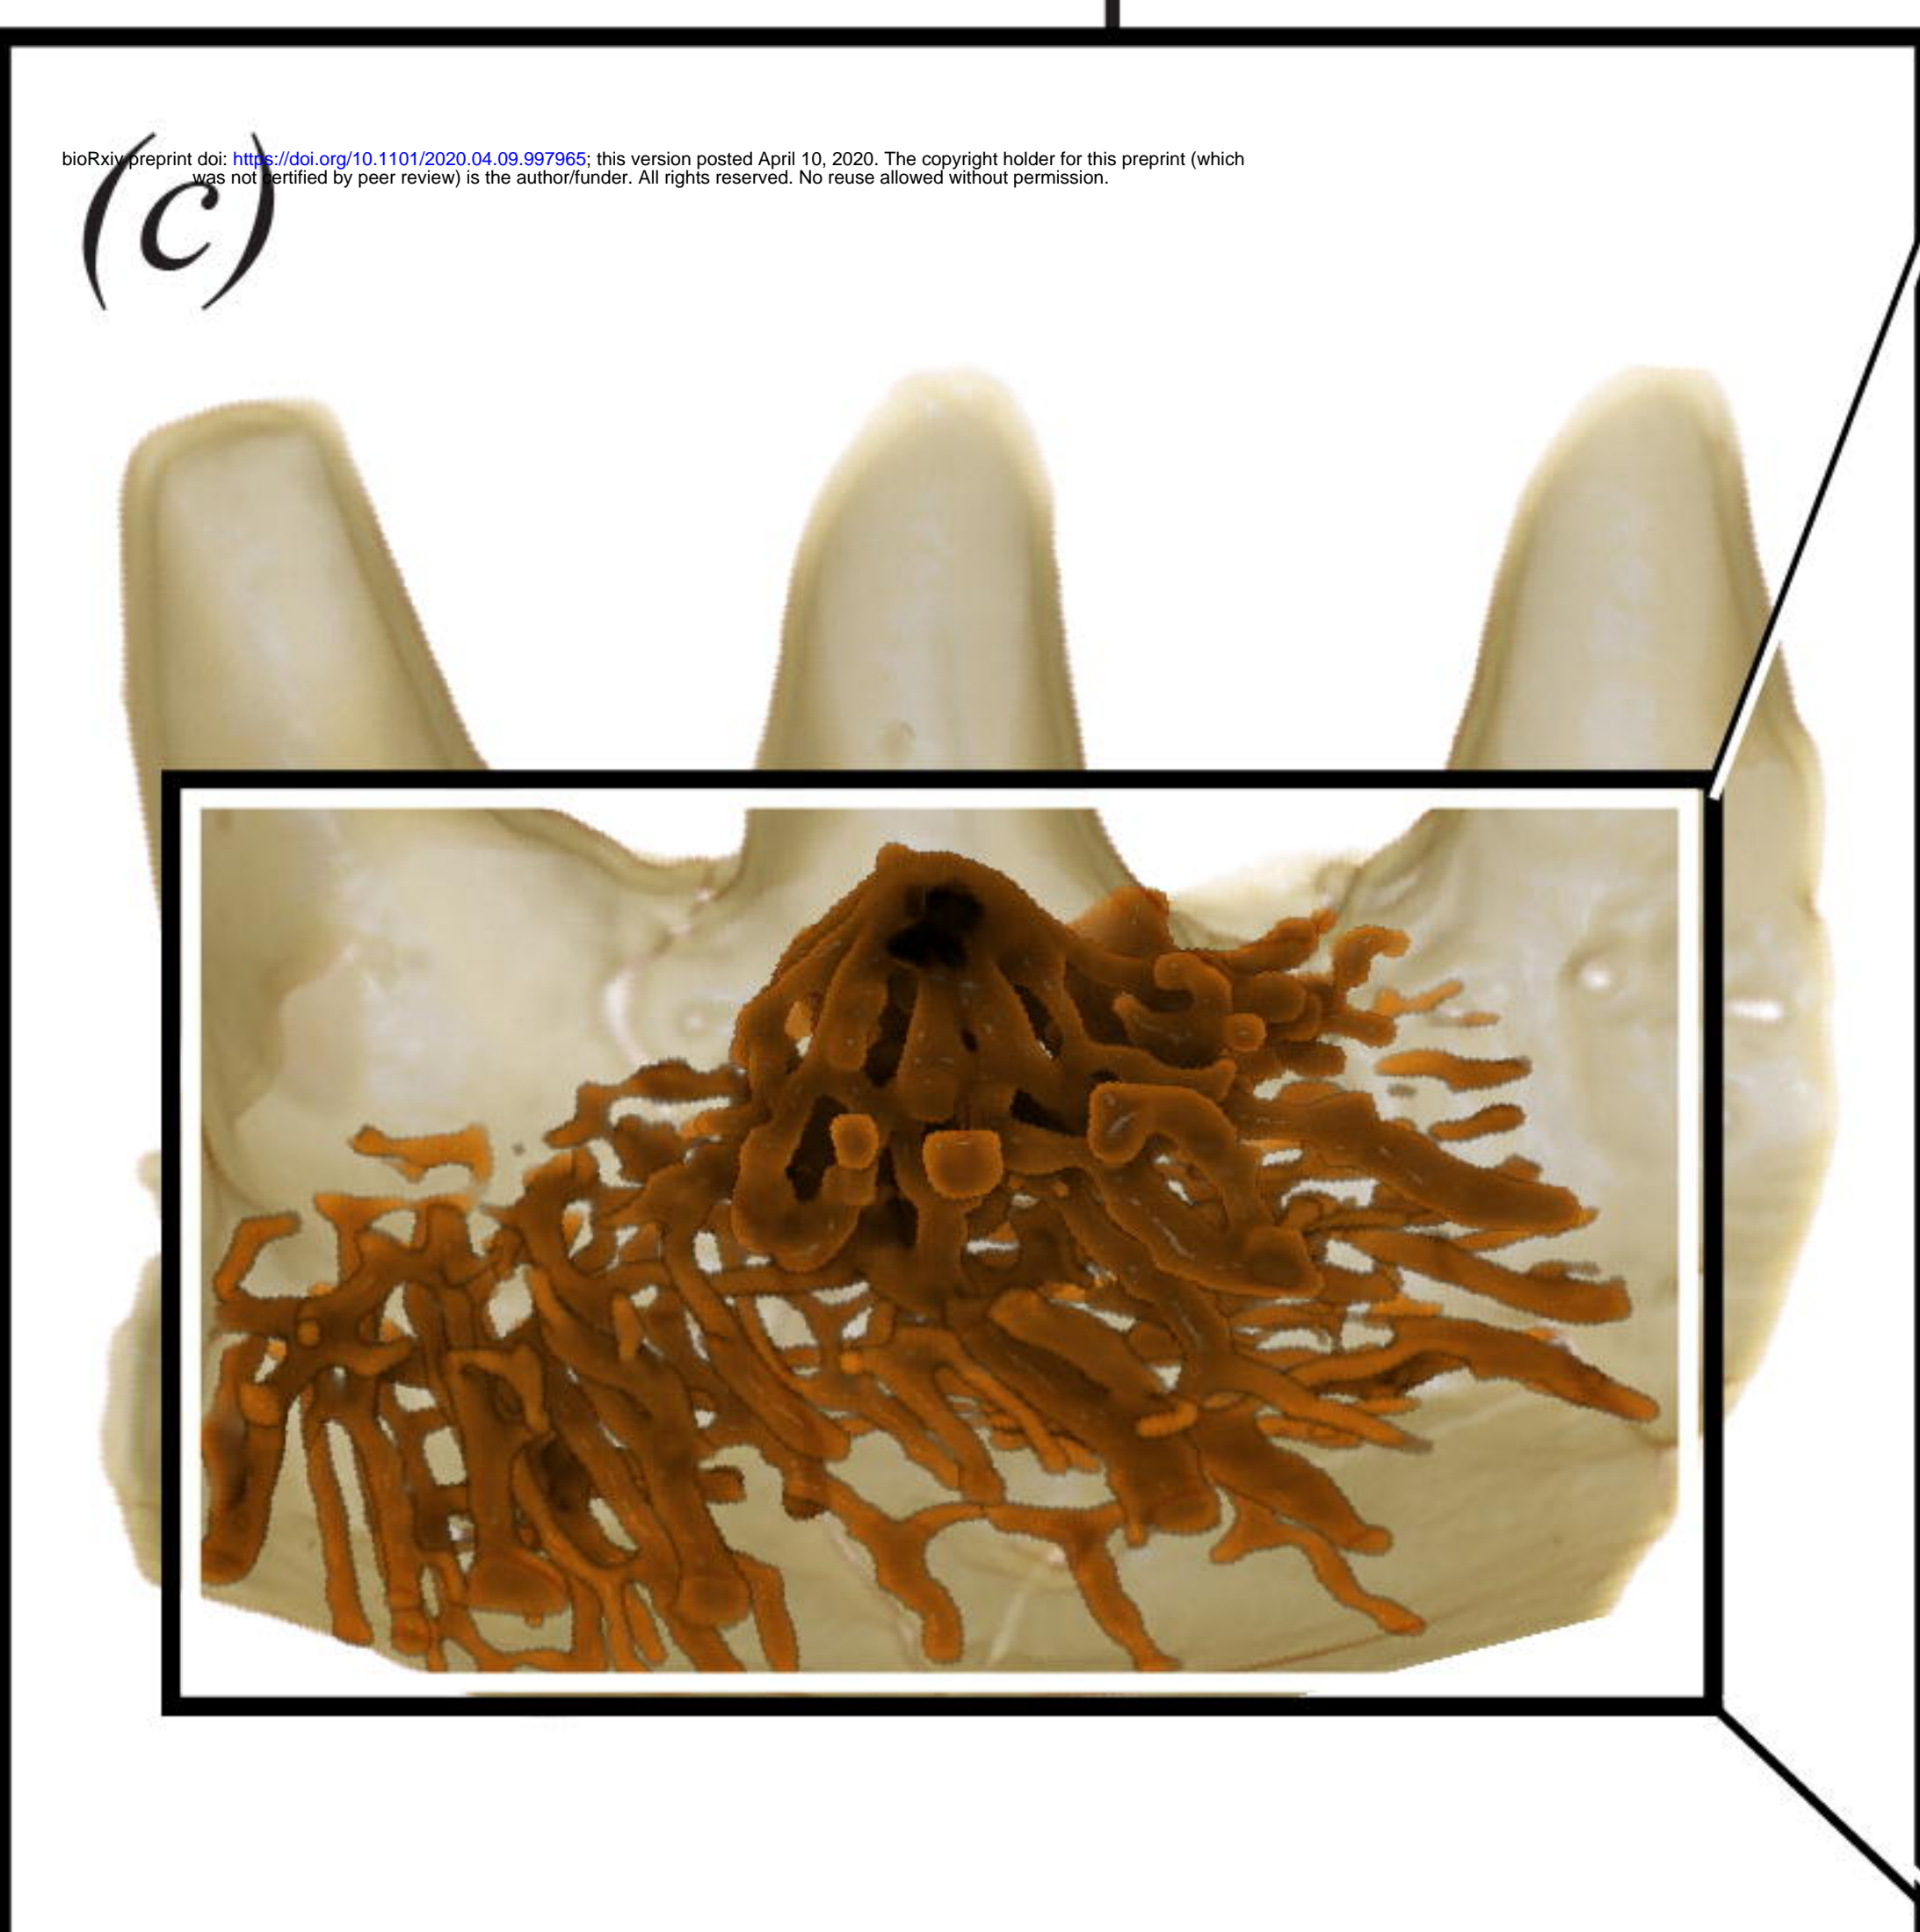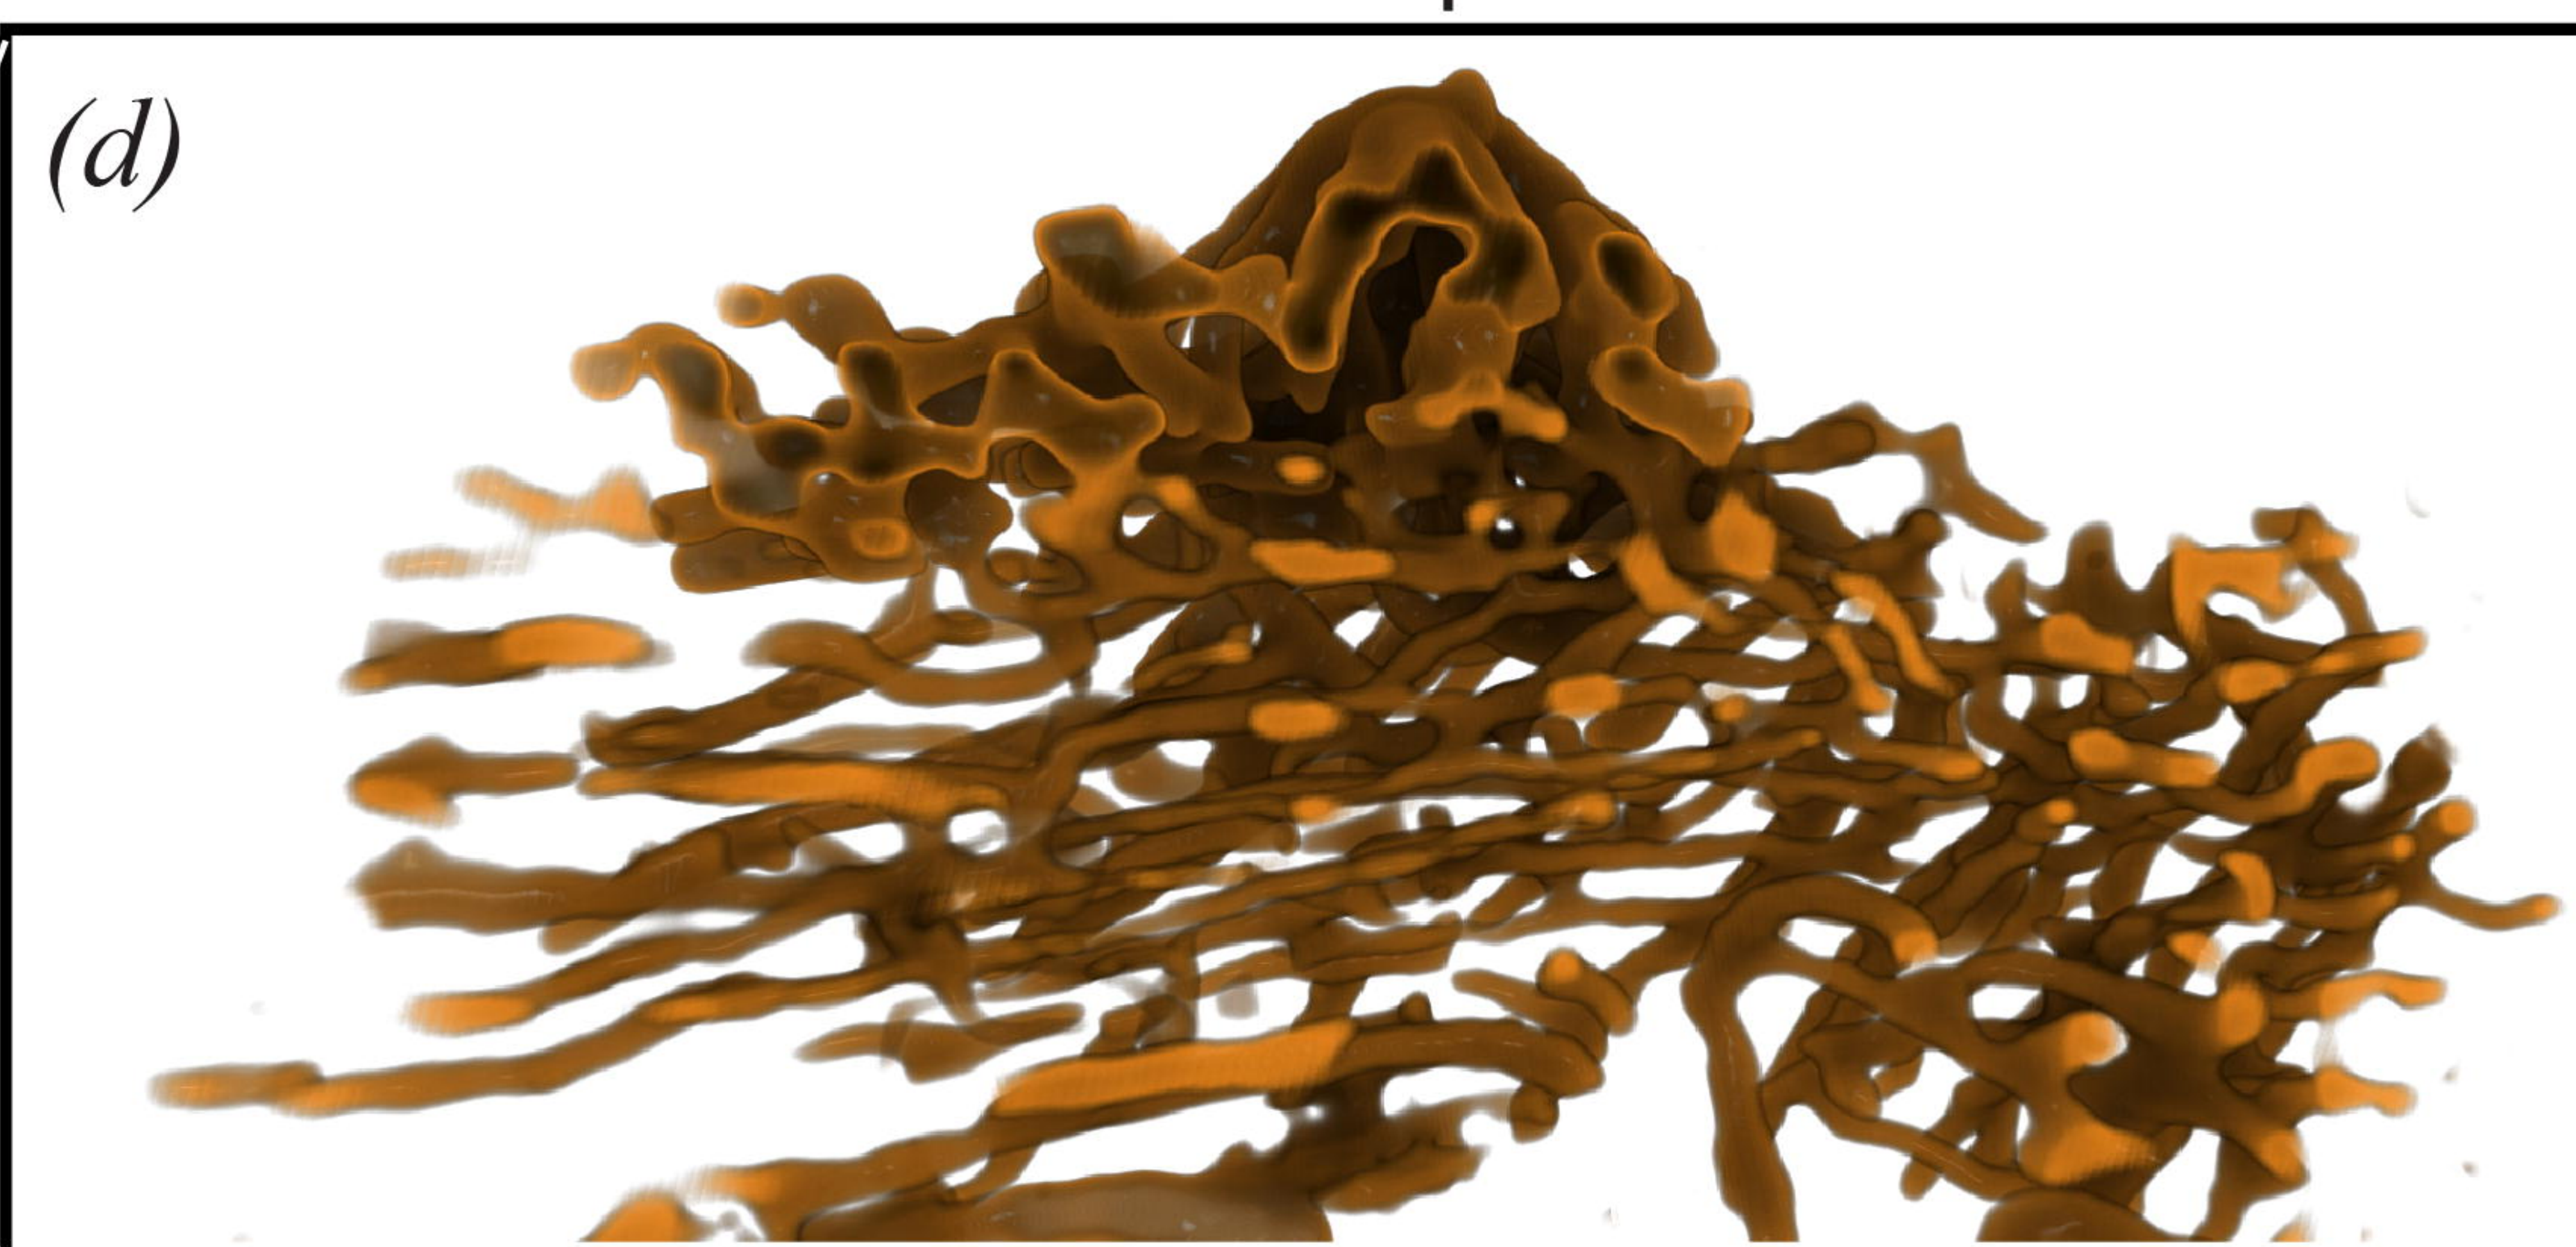



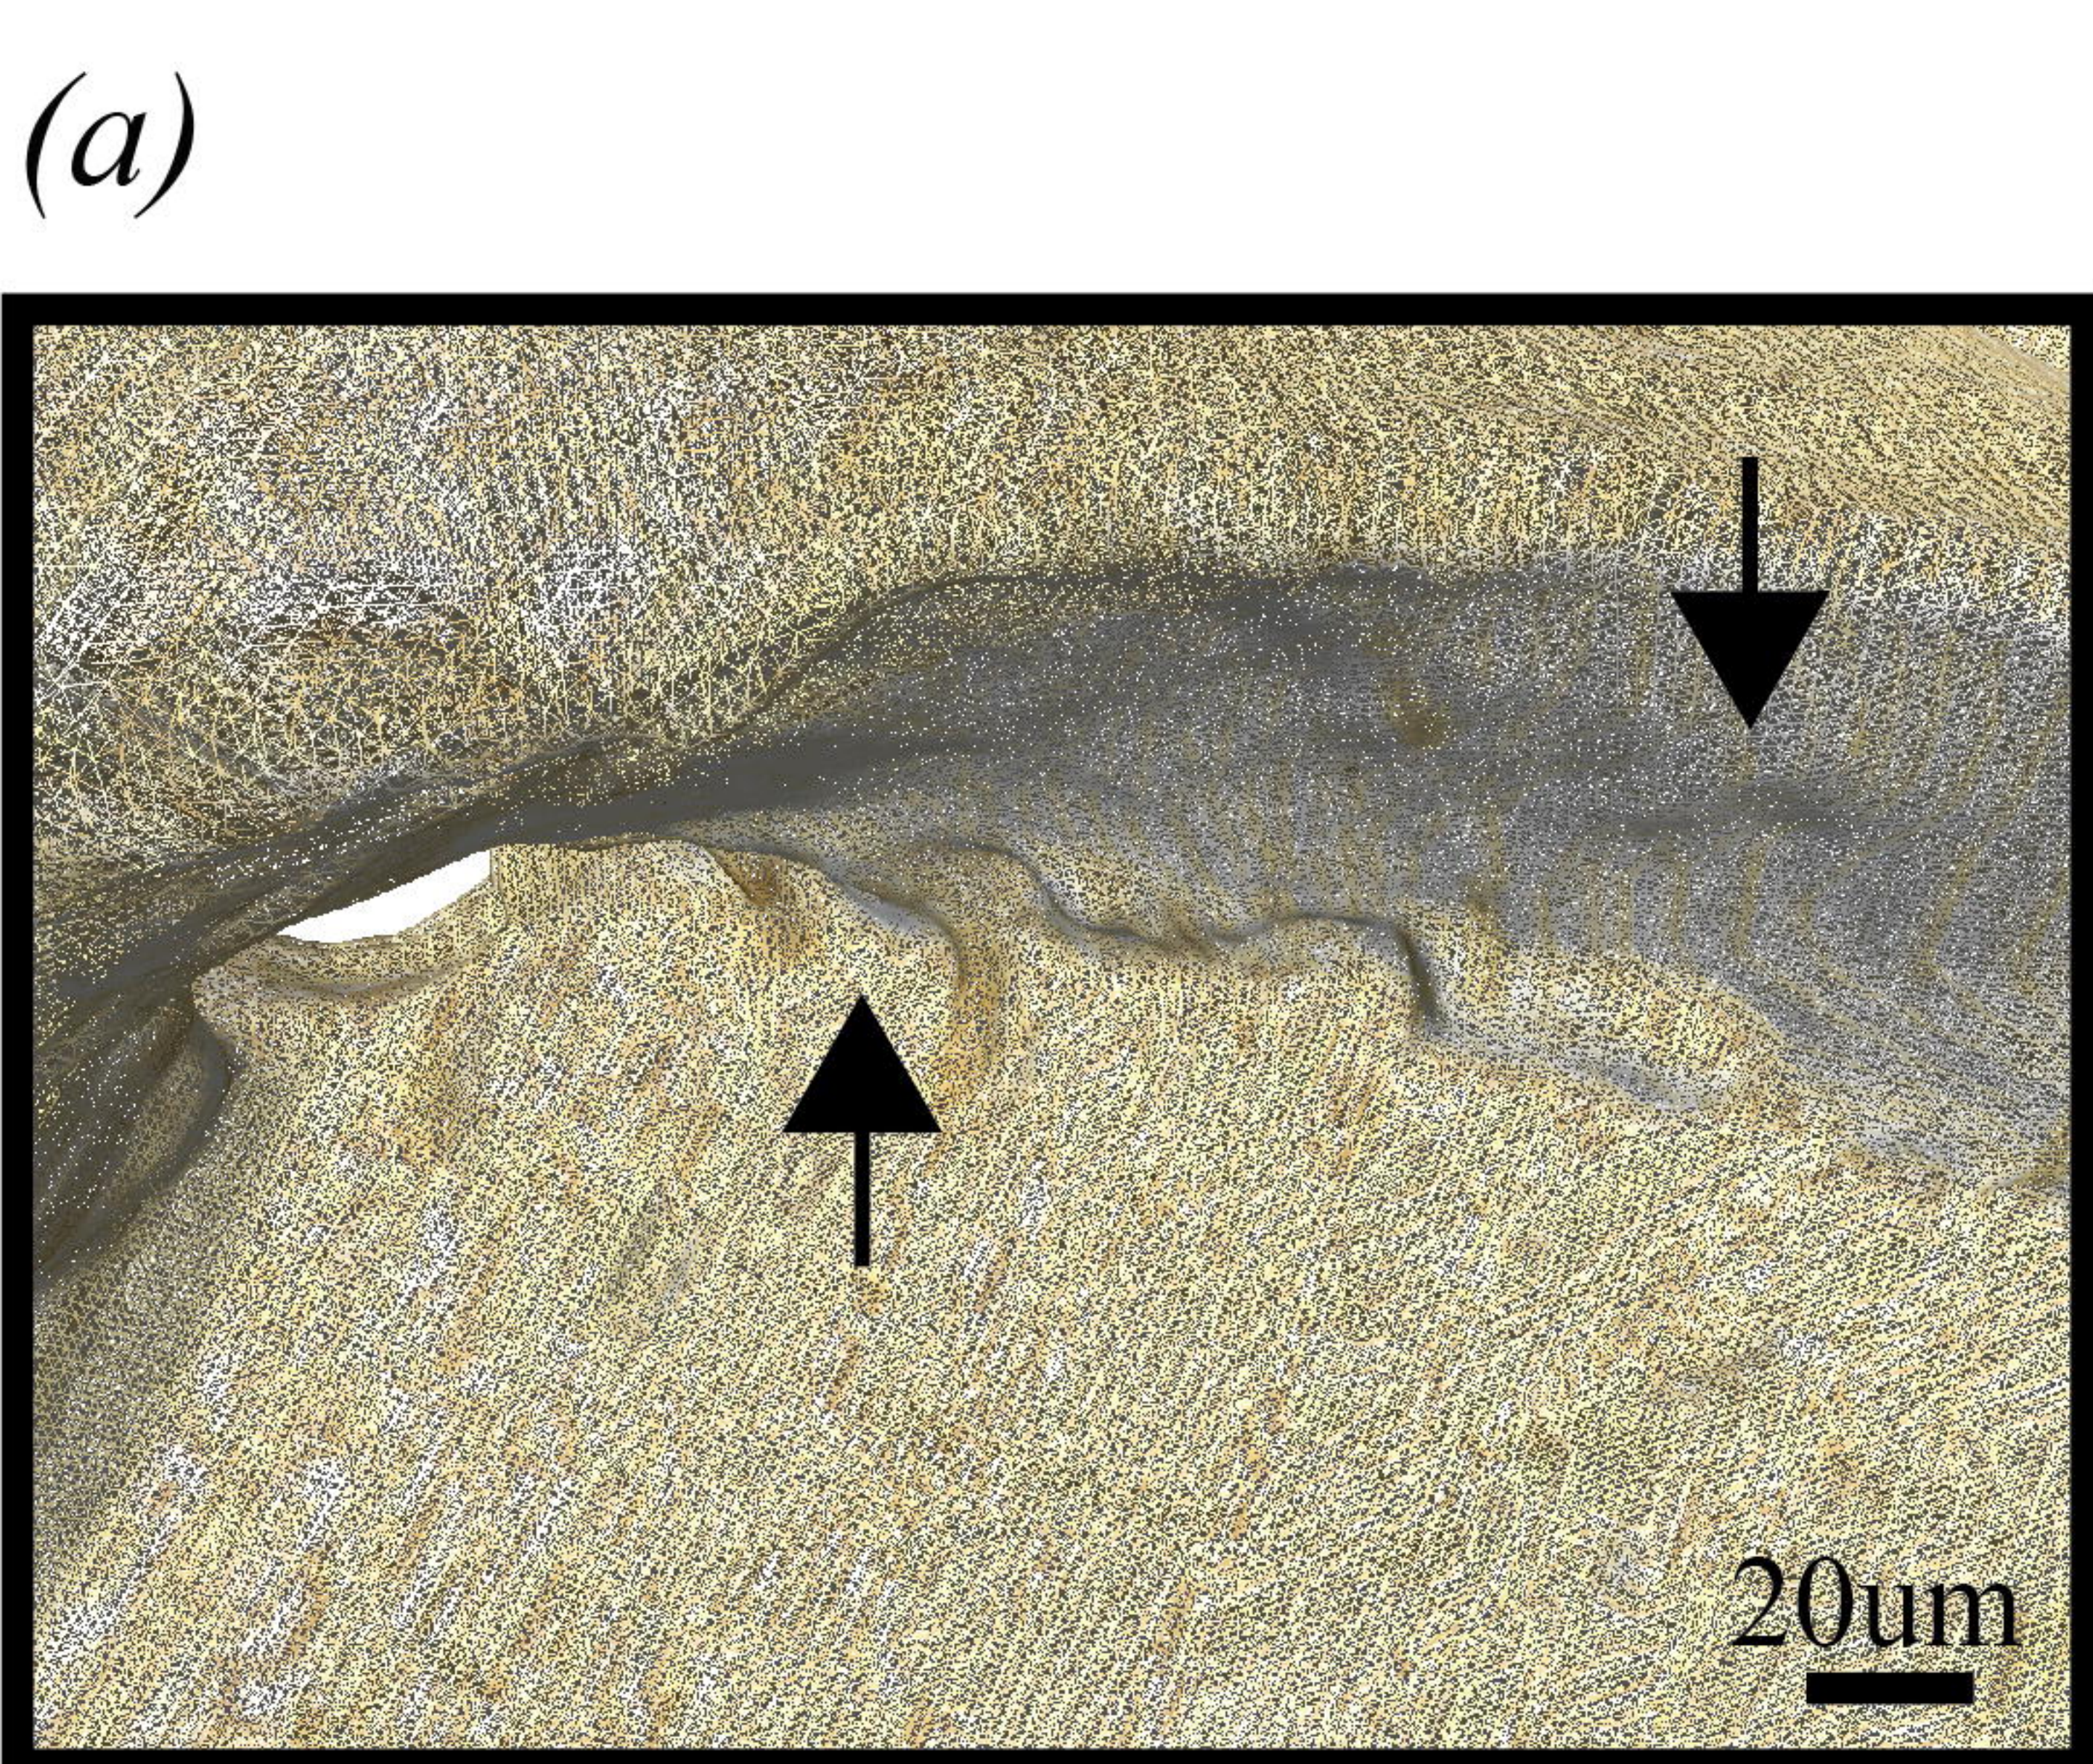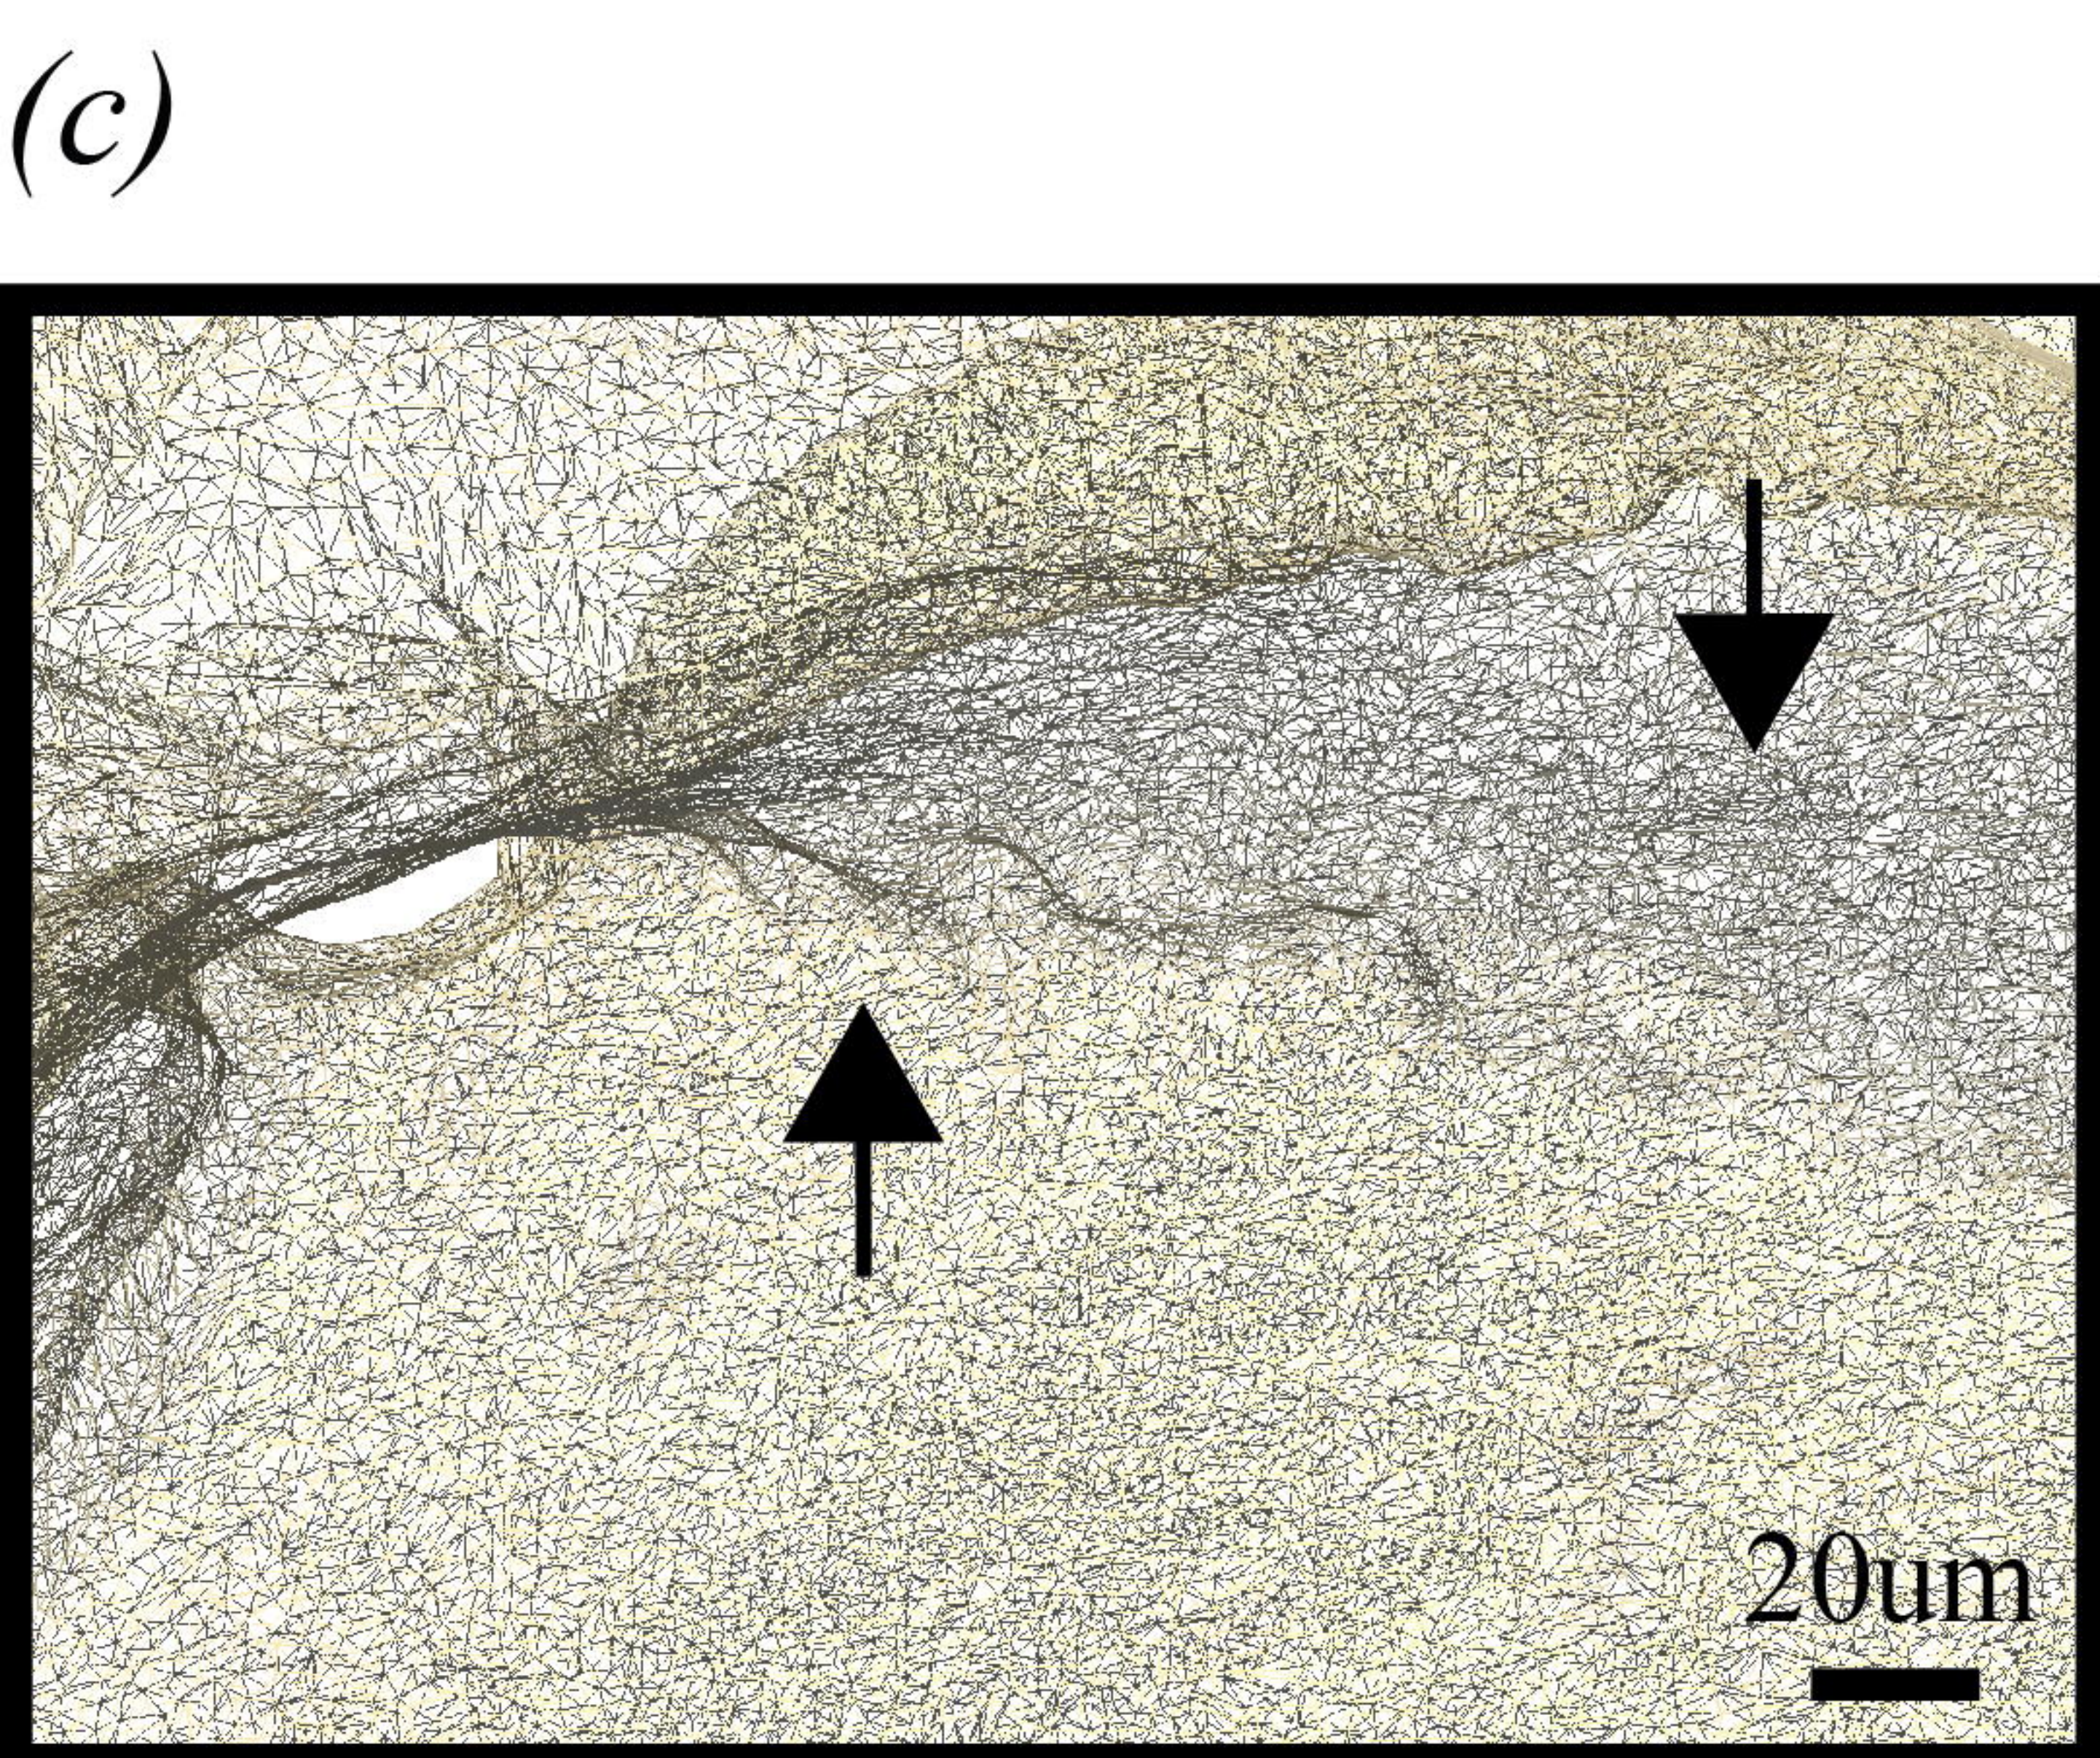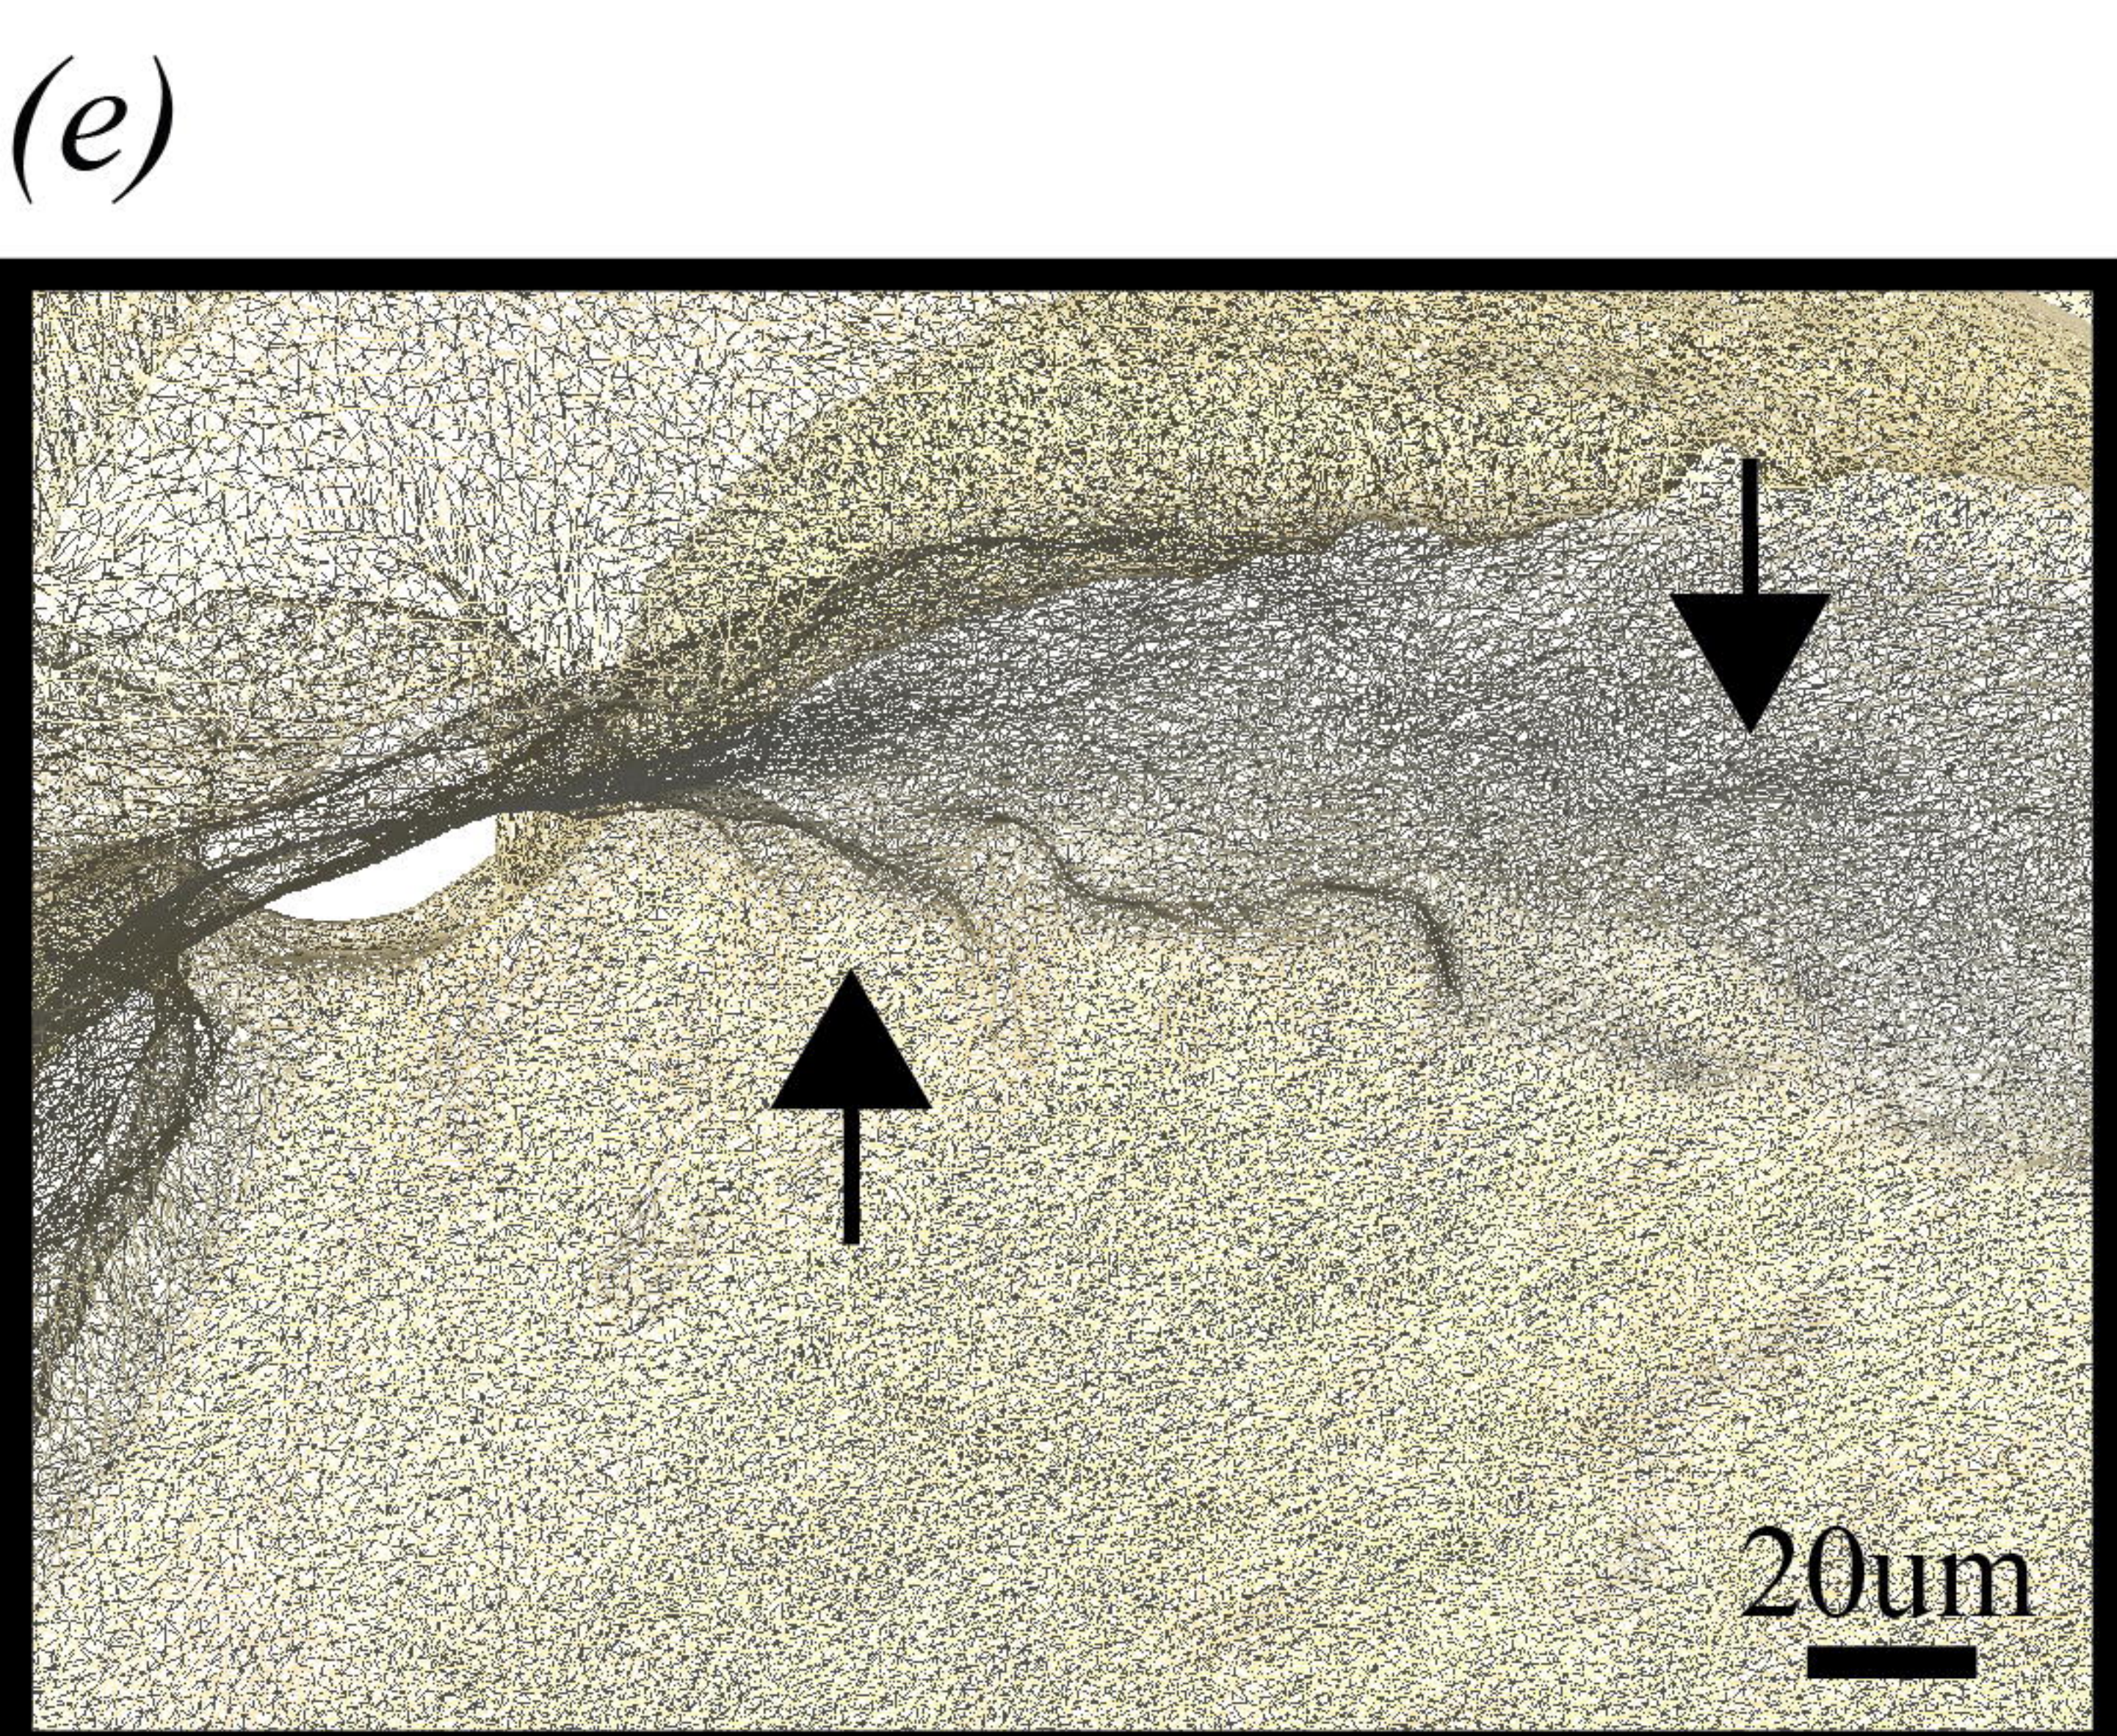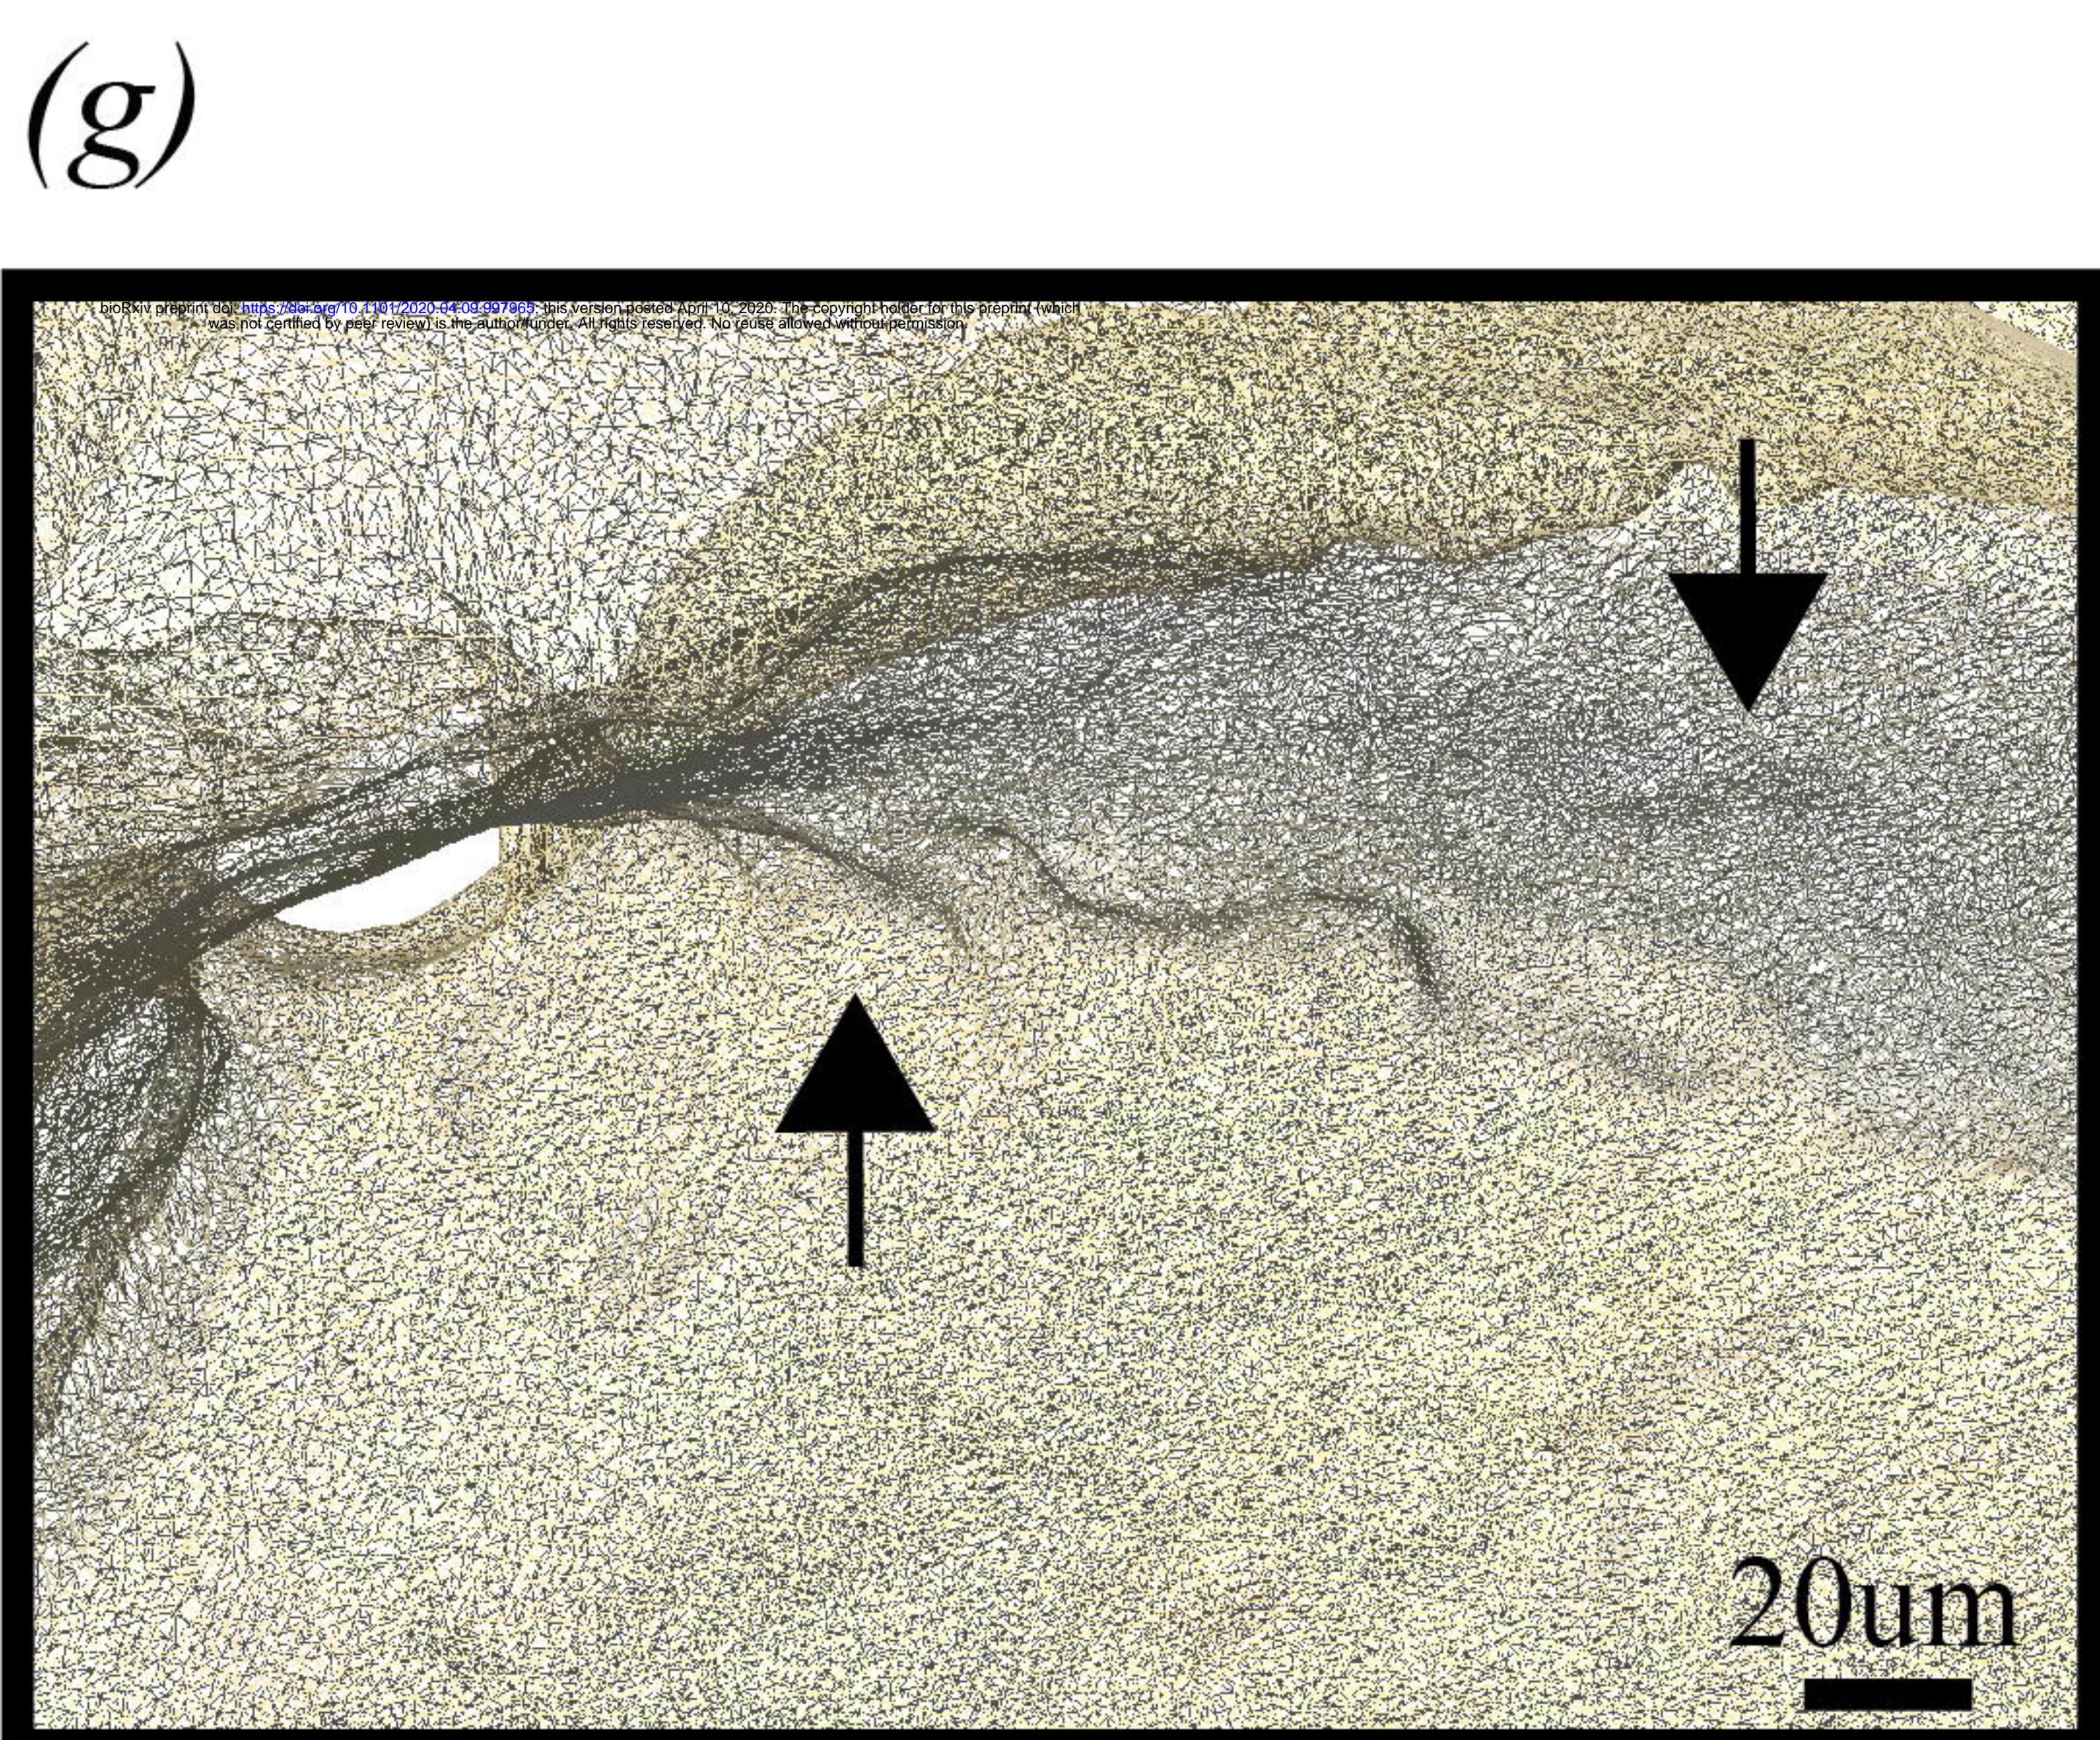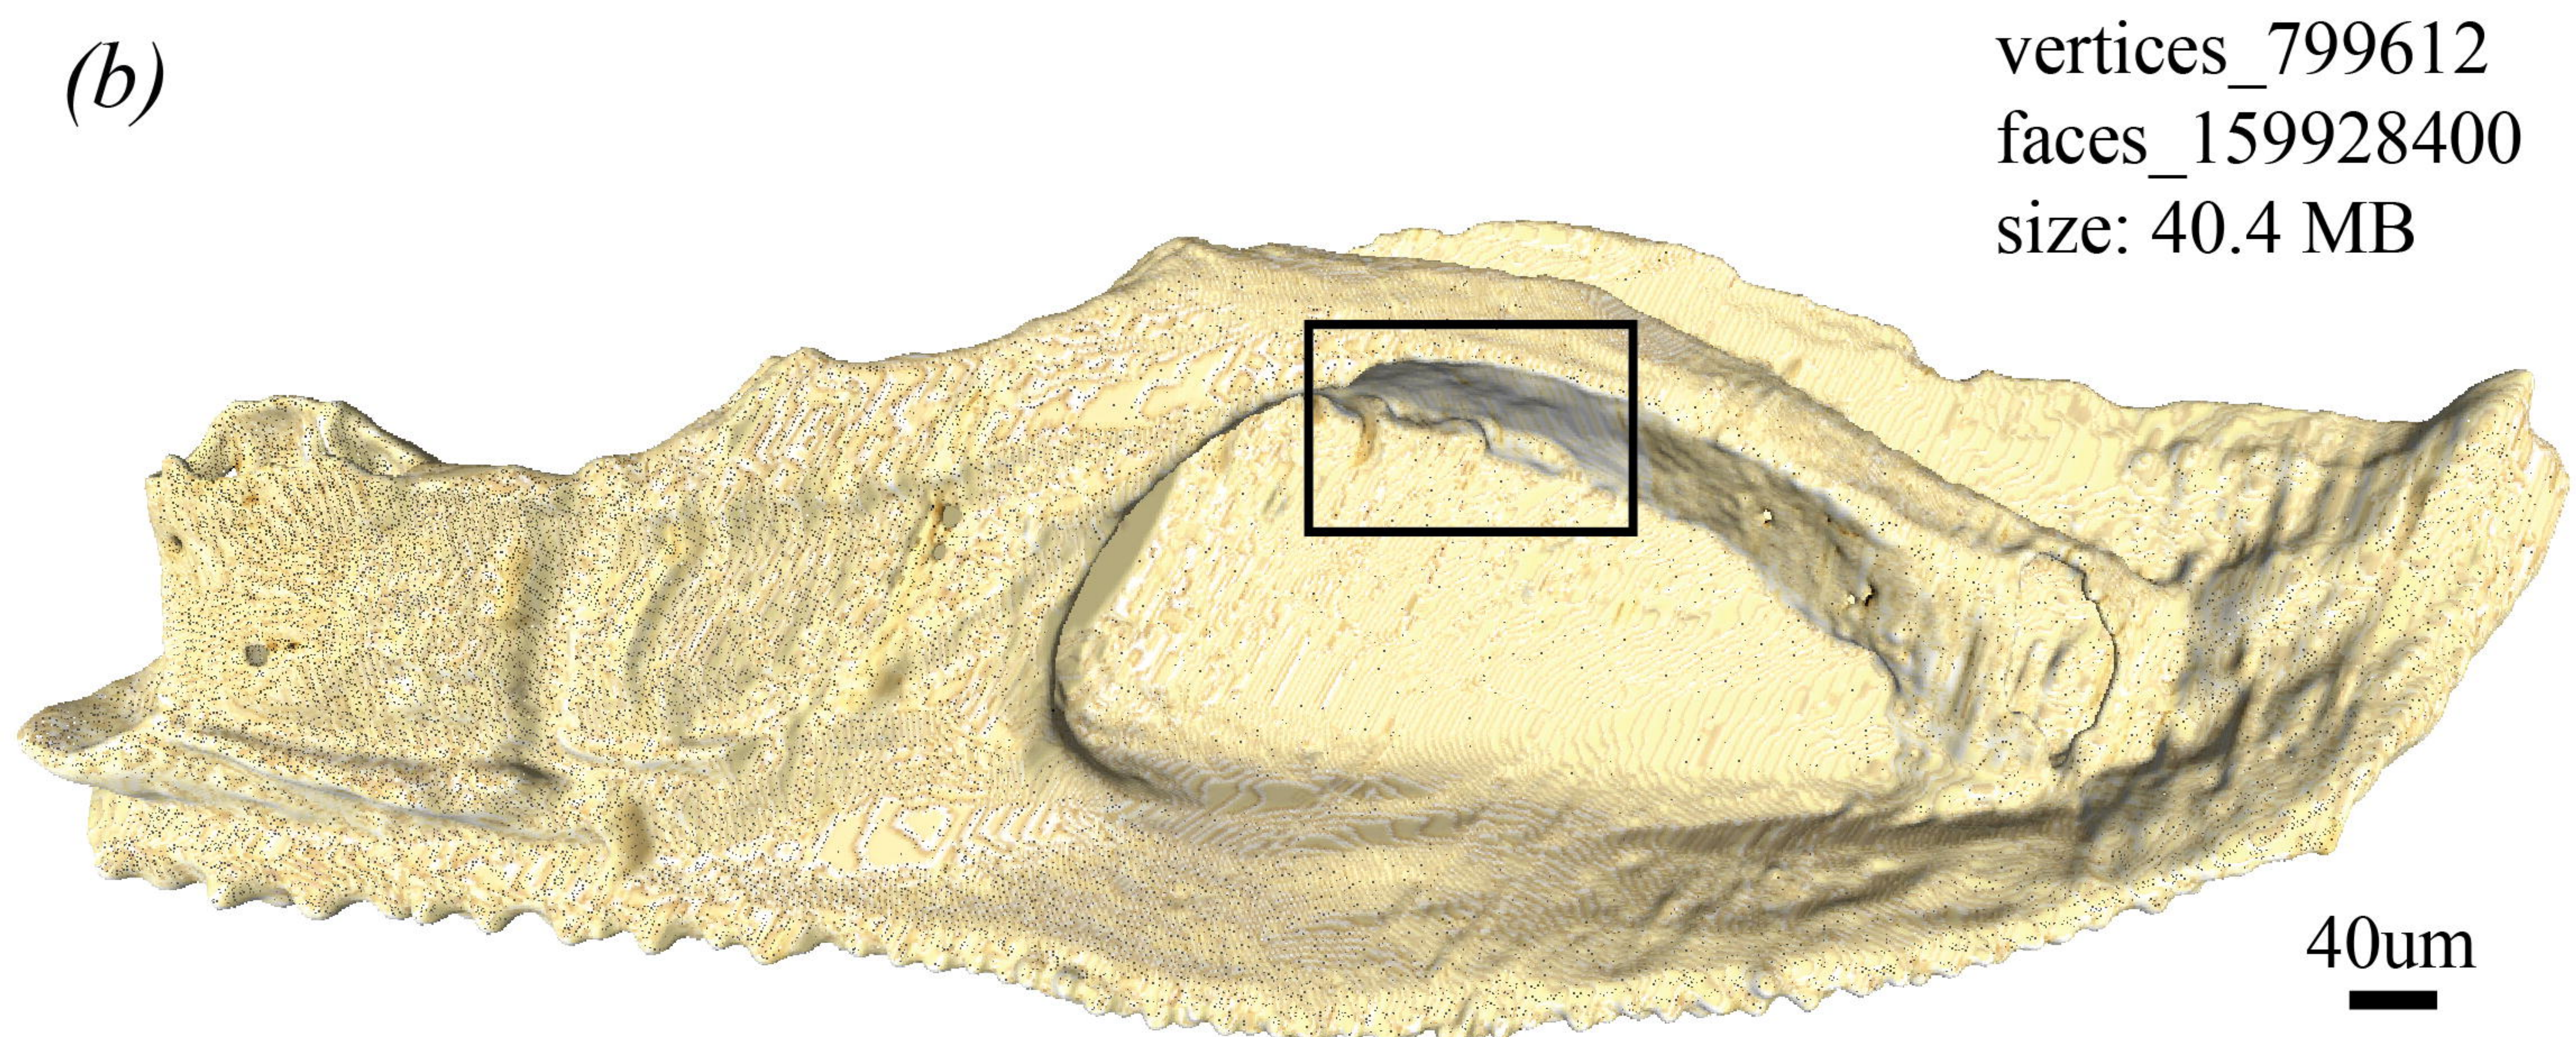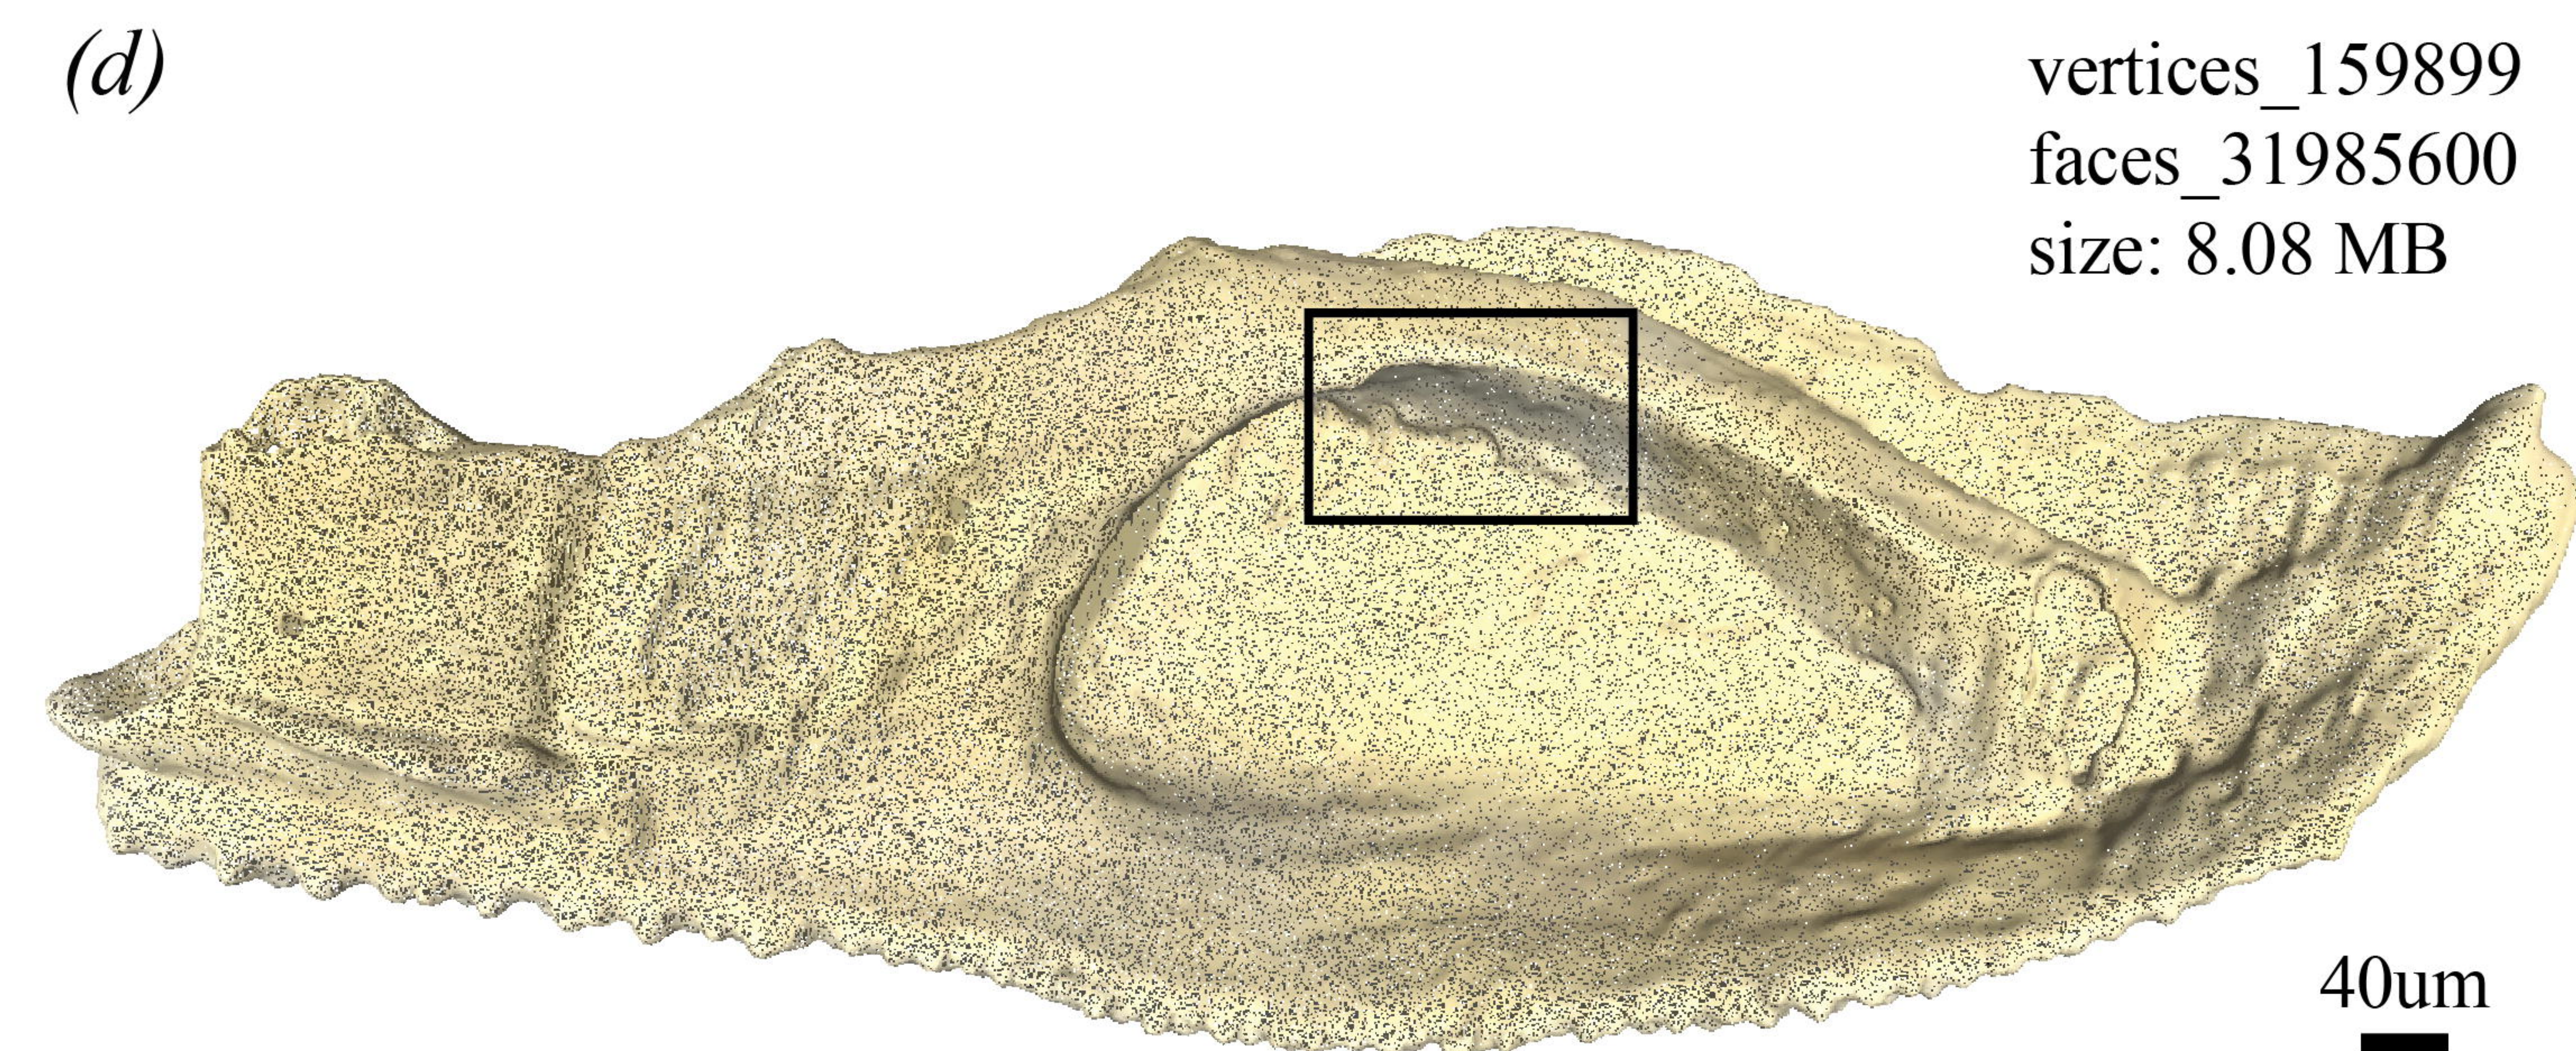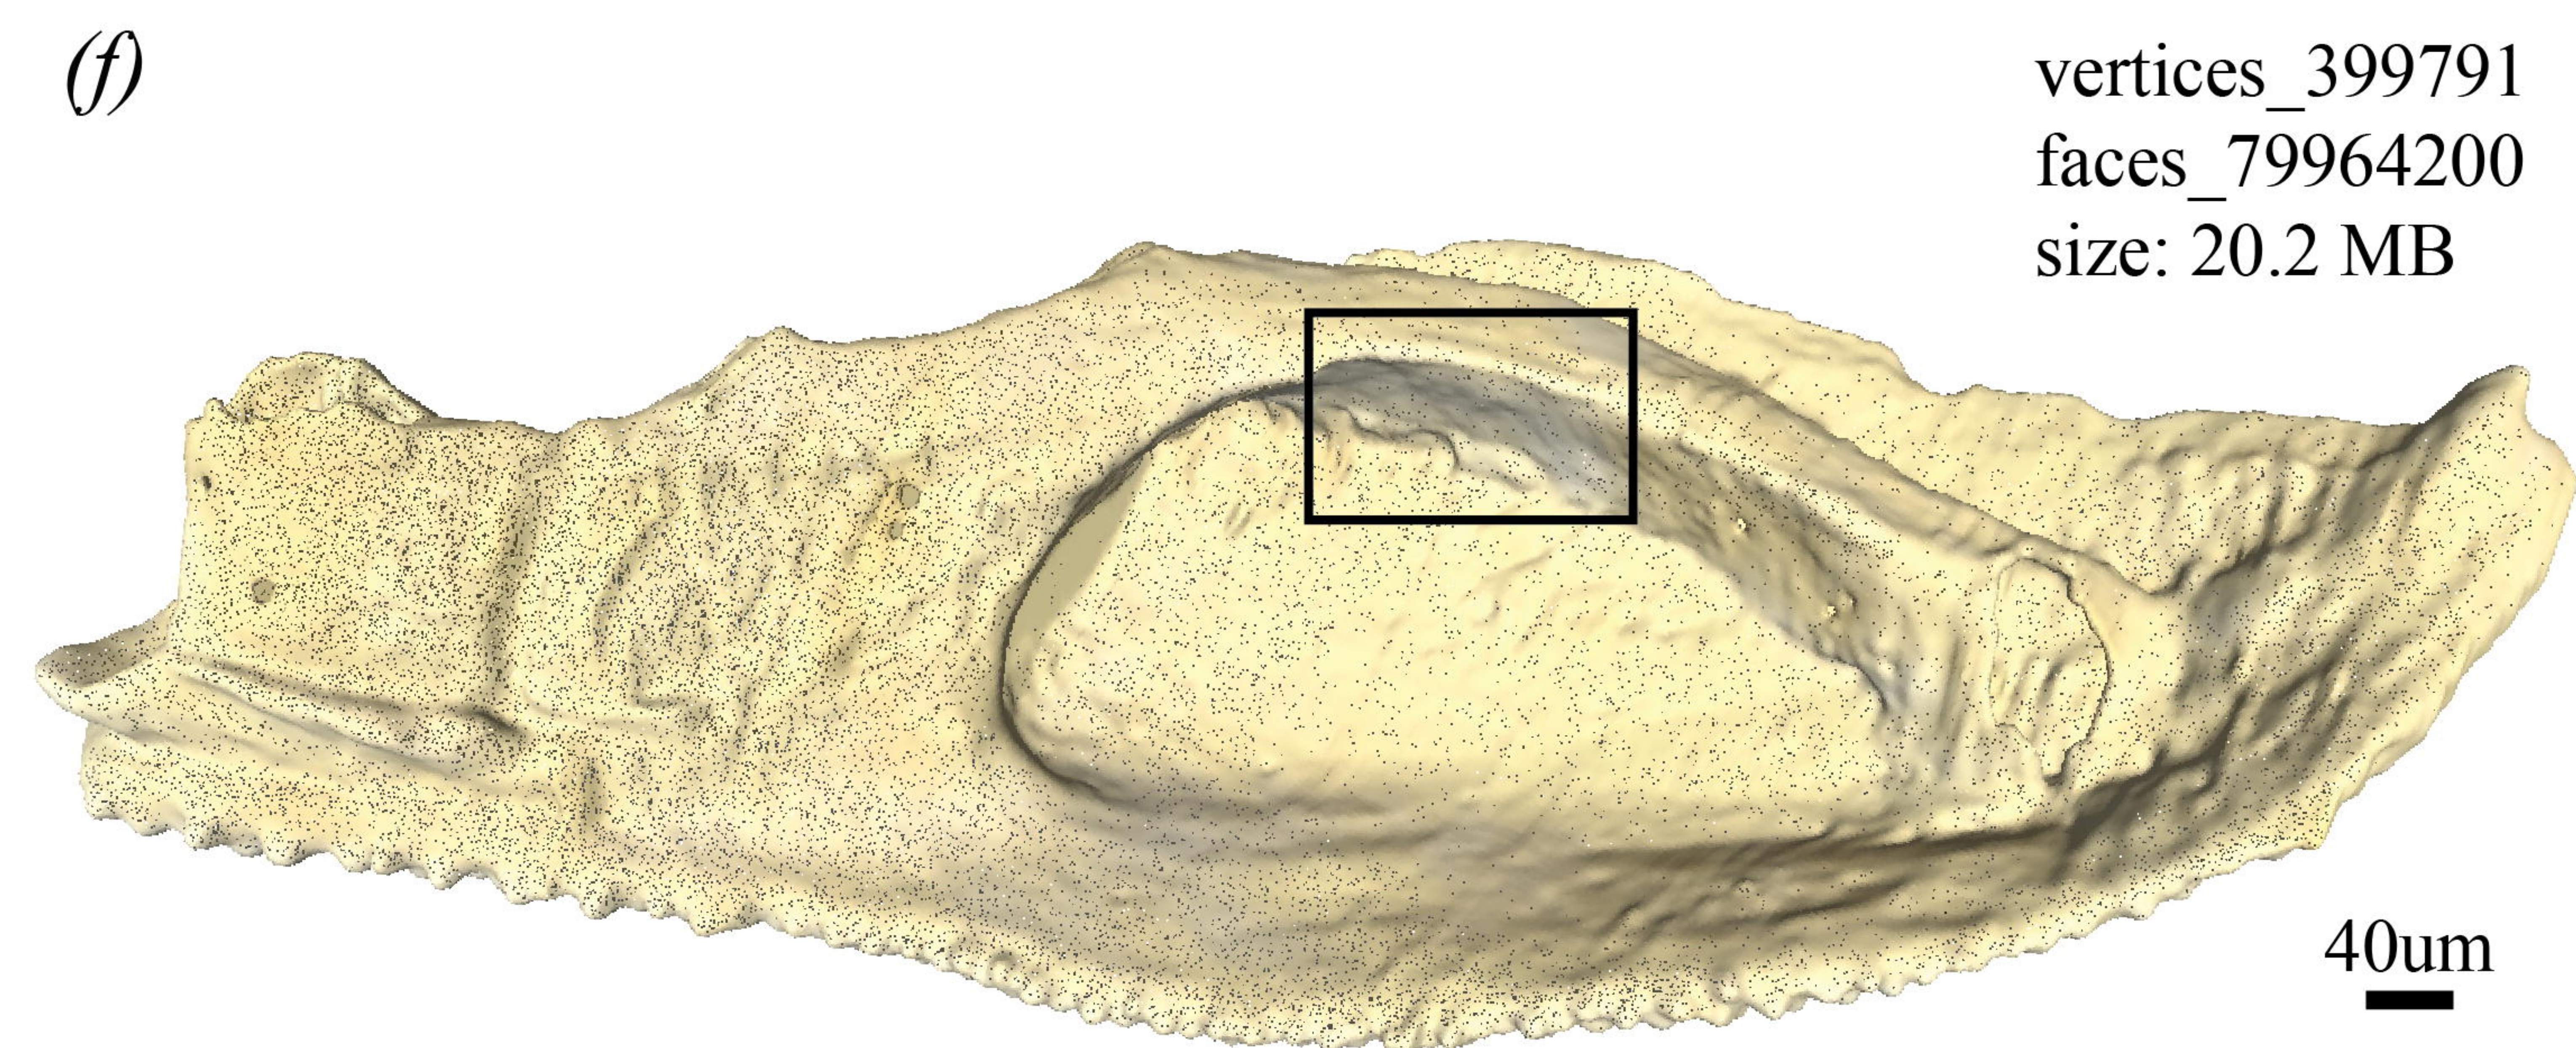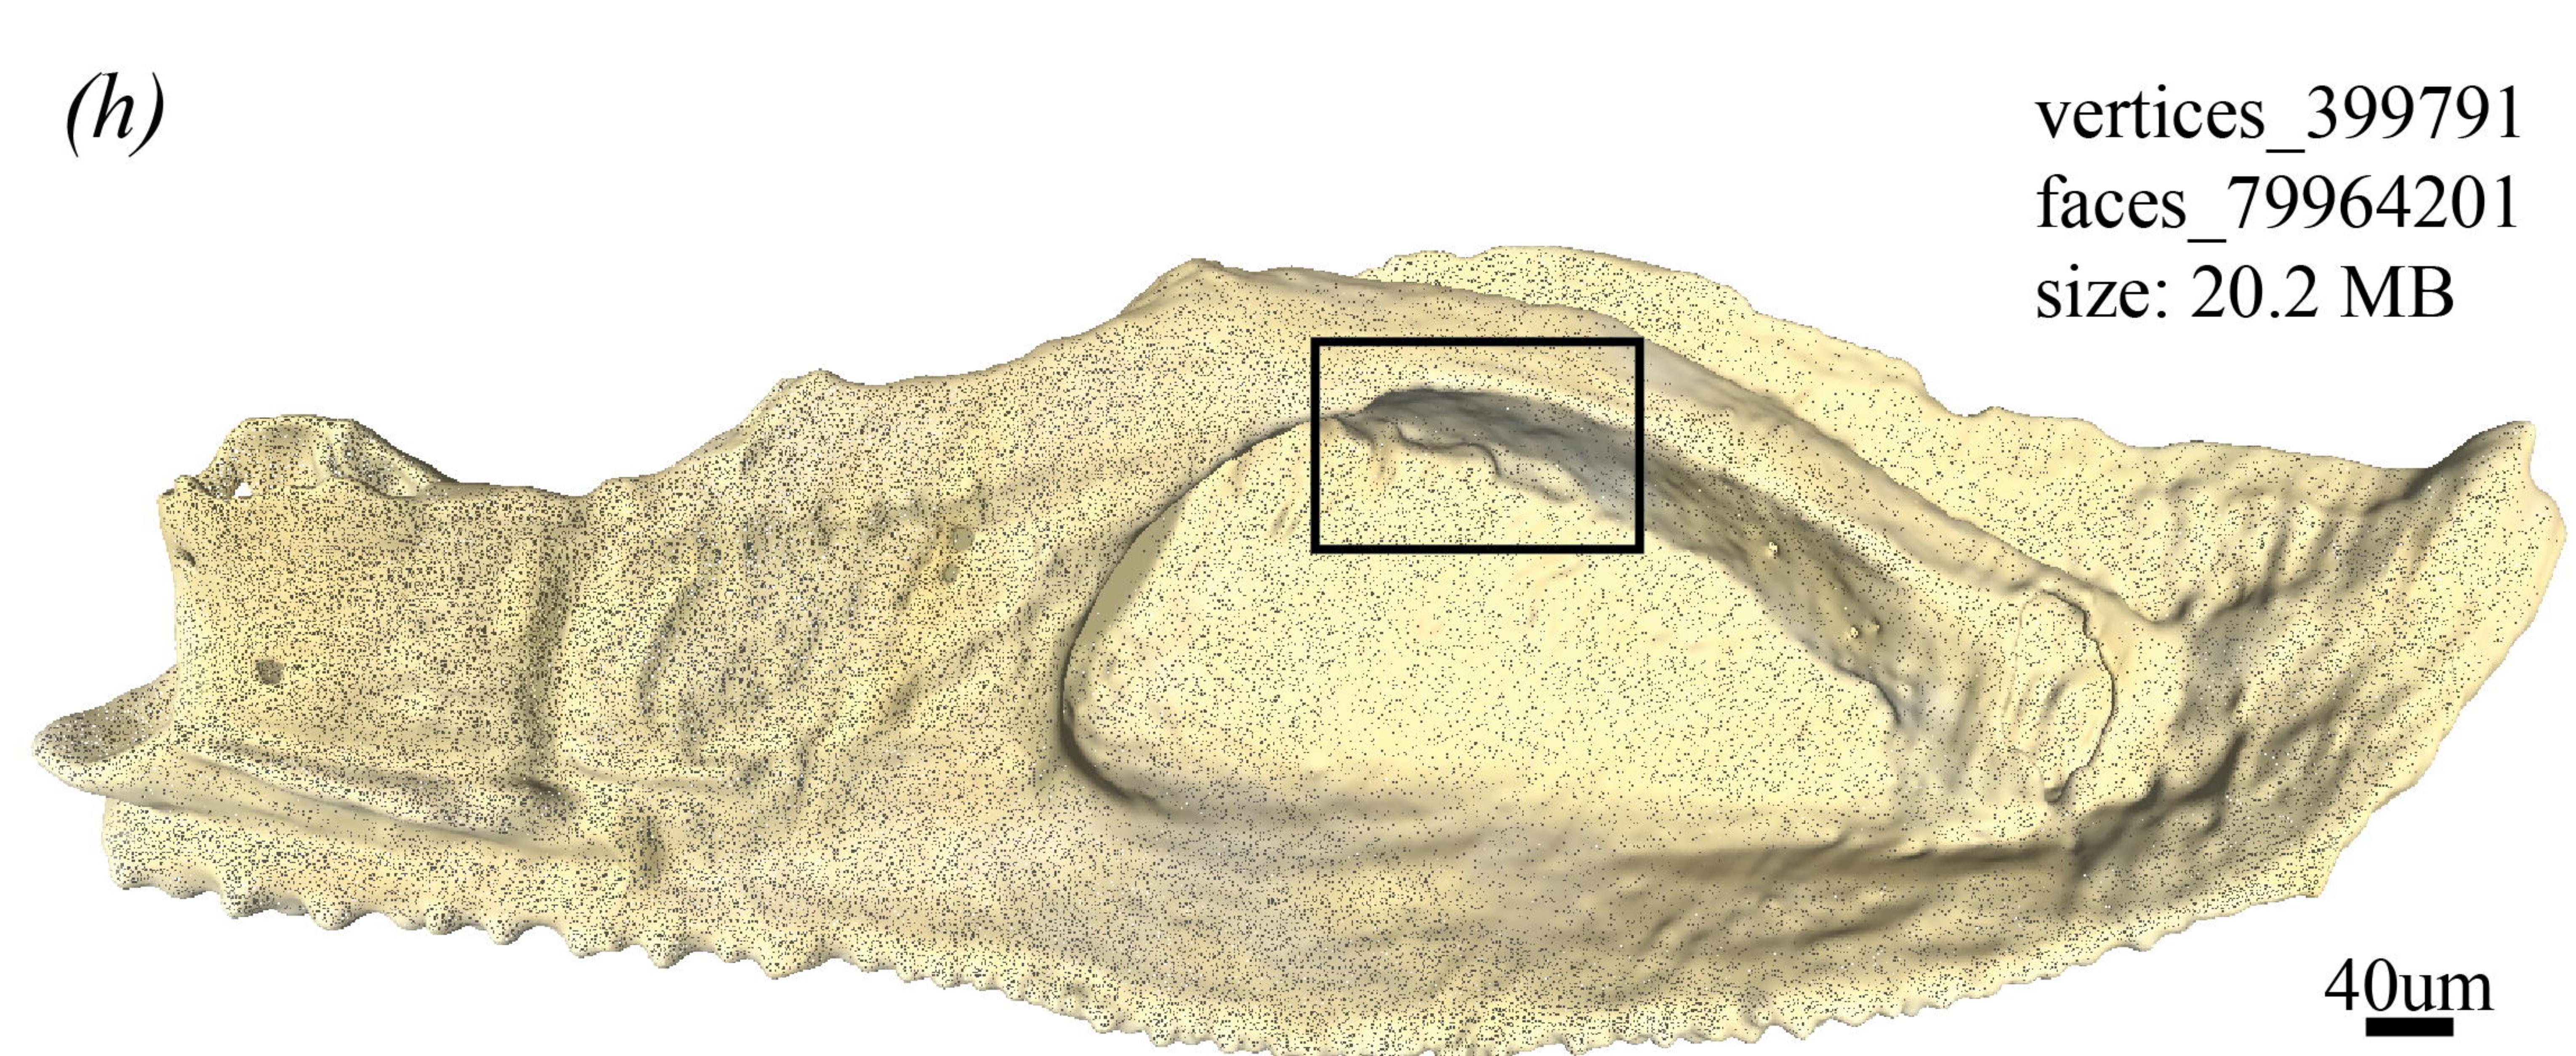

Original mesh

mesh smoothing 2  
decimate 80% of triangles  
aggressive 1  
color smoothing 50

mesh smoothing 2  
decimate 50% of triangles  
aggressive 1  
color smoothing 50

mesh smoothing 5  
decimate 50% of triangles  
aggressive 1  
color smoothing 50
